# Supplementary material for: Evaluation of Secretion Prediction Highlights Differing Approaches Needed for Oomycete and Fungal Effectors
Source: Front Plant Sci. 2015 Dec 23;6:1168. doi: 10.3389/fpls.2015.01168 (PMC4688413; doi:10.3389/fpls.2015.01168)
Supplement: Supplementary file 1 [file Table1.XLSX]

## Sheet: test_set
Type	Apoplastic/Cytoplasmic (if known)	Uniprot	Genbank	Effector	Species	Reference describing role in virulence	Reference Link	Sequence (inc signal peptide)
Fungal	cytoplasmic	Q09QS3	ABH03483	AVRa10	Blumeria graminis f. sp. tritici	Ridout et al., 2006, Plant Cell, Multiple Avirulence Paralogues in Cereal Powdery Mildew Fungi May Contribute to Parasite Fitness and Defeat of Plant Resistance	http://www.plantcell.org/content/18/9/2402	MDSSHSKPREKHANKKRTRVQSSKYEHHRGCAPSEGERCPRGRYGGRRSREAKNPRRFNFGILQPRRCRASLGSHRIPQKTVVAPEKRAAVPALPRPVEVRPTKEADIPTAKAAGAENSSLDQPPTAPEAAGREKIFPPELLAAIEAEERRARQKAAQFTICSTAISSVEAALQPLSTGEDKNFVDSIKVYLRAAIAQFVAAGPSTAPPVLPQRPSVGTPATVIPVAIPRNISKATAPLPLRSTWATVTRAGHQKSGAQAPANITSVSAAPSARKQEKKPAASTTA
Fungal	cytoplasmic	Q09QS2	ABH03482, ABH03484	AVRk1	Blumeria graminis f. sp. tritici	Ridout et al., 2006, Plant Cell, Multiple Avirulence Paralogues in Cereal Powdery Mildew Fungi May Contribute to Parasite Fitness and Defeat of Plant Resistance	http://www.plantcell.org/content/18/9/2402	MIGSVEIIEKISQLPSVPHRIGELSKSPPTASKRSENAAPISAPKLMSQLKAATKAECPPELRPIVEAIQQRAAKTAANLALCSAAISGVEATLLPLTNGSNRPFVDSMRVYLRAAIAQYIATVPASTPPVLPPRLANPLPRAPDARSIQIPAVPALPLKSTRATVVKMDCHKKQFL
Fungal	unknown	Q079H4	ABB43263	Nep1	Botryotinia fuckeliana	Staats et al., 2007, FGB, Positive selection in phytotoxic protein-encoding genes of Botrytis species	http://www.sciencedirect.com/science/article/pii/S1087184506001344	MHFSNAKFLSILAAAAAVKGAPIEESTIQARAVVPHDSINPWGENVPGNALGNTLKRFEPYLHIAHGCQPYSAVDGNGNTSGGLQDTGNVSAGCRDQSKGQTYVRGGWSGGRYGIMYAWYFPKDQPAAGNVVGGHRHDWEYVVAWVNNPEVANPTLIGAGASGHGSIKKTTNPQRQGDRLKVEYYVSFPTNHELQFTNTLGRDLPMMWYDFLPAVSKTALQNTNFGKANCPFNDANFNNNLAKARI
Fungal	apoplastic	Q8NID8	AGD98923, AIZ11401, AIZ11402, AJF35002, CAD16675, CAD16676	AVR2	Passalora fulva	Luderer et al., 2002, Mol Micro, Cladosporium fulvum overcomes Cf-2-mediated resistance by producing truncated AVR2 elicitor proteins	http://onlinelibrary.wiley.com/doi/10.1046/j.1365-2958.2002.03060.x/pdf	MKLFILTFIWLLTASEVIAAAKKLPGCDKDPCKVKEKSGKYKLKIGAKCSATCDGKLTRGGTCENVQGNHLCCFGLCG
Fungal	apoplastic	Q00363	CAA55403, CAA69643	AVR4	Passalora fulva	Joosten etal., 1994, Nature, Host resistance to a fungal tomato pathogen lost by a single base-pair change in an avirulence gene	http://www.nature.com/nature/journal/v367/n6461/abs/367384a0.html	MHYTTLLLSTLLVGTALAQPTNPPAKTPKKAPKTQPYNPCKPQEVIDTKCMGPKDCLYPNPDSCTTYIQCVPLDEVGNAKPVVKPCPKGLQWNDNVGKKWCDYPNLSTCPVKTPQPKPKKGGVGGKKASVGHPGY
Fungal	apoplastic	Q5VB04	AAT28197, AGD98914, AGD98915, AGD98916, AGD98917, AGE81873	AVR4E	Passalora fulva	Westerink et al , 2004, Mol Micro, Cladosporium fulvum circumvents the second functional resistance gene homologue at the Cf-4 locus (Hcr9-4E ) by secretion of a stable avr4E isoform	http://onlinelibrary.wiley.com/doi/10.1111/j.1365-2958.2004.04288.x/abstract	MQFPTPHLLLTTLLATITTADFSRDCPPGSGVGNQAEWSARGVDGTAIPRELDAHSLCDCFKPFLNVLGCSVTSVVTERAVFVKGHLNYCARMSESVAGISPCKEWEIEVGGAHPERMANR
Fungal	apoplastic	A0A023UJQ9	AHY02126	Avr5	Passalora fulva	Mesarich et al., 2014, MPMI, Transcriptome sequencing uncovers the Avr5 avirulence gene of the tomato leaf mold pathogen Cladosporium fulvum.	http://apsjournals.apsnet.org/doi/abs/10.1094/MPMI-02-14-0050-R	MKSPIVITILATALGALGSYDALPINCRDTTNYCFNGNGRHEVCSYCNQAKEEPLKLGRRGGQRDCGVAGSQCNDVDHQQCDARCCSKIGSPTFYGVRCPYPY
Fungal	apoplastic	P22287	AAA03344, CAA42824	AVR9	Passalora fulva	Schottens-Toma et al., 1988, PMPP, Purification and primary structure of a necrosis-inducing peptide from the apoplastic fluids of tomato infected with Cladosporium fulvum (syn. Fulvia fulva)	http://www.sciencedirect.com/science/article/pii/0885576588900434	MKLSLLSVELALLIATTLPLCWAAALPVGLGVGLDYCNSSCTRAFDCLGQCGRCDFHKLQCVH
Fungal	apoplastic	Q00364	CAA78400	Ecp1	Passalora fulva	Lauge et al , 1997, MPMI, The In Planta–Produced Extracellular ProteinsECP1 and ECP2 of Cladosporium fulvumAre Virulence Factors	http://apsjournals.apsnet.org/doi/abs/10.1094/MPMI.1997.10.6.725	MHFVTSLIAGVAMLATASATVQGGAPVDDLKFAKKFNQNCQQISGGPNGAICPDGDLYWCKDGRAIFCQTCQTGCTADENGKVGYCNEGPTNPKCL
Fungal	apoplastic	Q00365	CAA78401	Ecp2	Passalora fulva	Lauge et al , 1997, MPMI, The In Planta–Produced Extracellular ProteinsECP1 and ECP2 of Cladosporium fulvumAre Virulence Factors	http://apsjournals.apsnet.org/doi/abs/10.1094/MPMI.1997.10.6.725	MLFNAAAAAVFAPLLVMGNVLPRNAGNSPGSNRCDASTFNNGQDFDIPQAPVNDCRQMVENINRDSQFSVSHSWARPFGGYGDCAFNVRVIAGWRNGLVGGADAVDLLTDSVKNFGEANKVSSKGTYNQIVSAEGEVTCDSVDRGGQVRVQWIVASSSYNPSNDD
Fungal	apoplastic	Q9P408	ABM47072, CAC01609	Ecp4	Passalora fulva	Lauge et al., 2000, Plant J., Specific HR-associated recognition of secreted proteins from Cladosporium fulvum occurs in both host and non-host plants	http://onlinelibrary.wiley.com/doi/10.1046/j.1365-313x.2000.00843.x/full	MQIPTSLLALTATLTFAVADPSFRFSEYGNGDTTCSPDNLISPSVSIDDGFGGCKQFPANTNSVQYALLEGSRAGCIVKLFTNNACNESADSEHVPAVGETKCQPPIGGGWQSVQVTCP
Fungal	apoplastic	Q9P407	ABM47073, CAC01610	Ecp5	Passalora fulva	Lauge et al., 2000, Plant J., Specific HR-associated recognition of secreted proteins from Cladosporium fulvum occurs in both host and non-host plants	http://onlinelibrary.wiley.com/doi/10.1046/j.1365-313x.2000.00843.x/full	MNTFTLLLATLPLLAYGRGDNKPGQFNYICEDIPCDEEGVDSWILQACIGIGGTELTAHGGIYDTTGELVGRTAICLCARGQTKAHDYNISGDYPPGVAHLTFDVRAPYWCQSSG
Fungal	apoplastic	B3VBK9	ACF19427	Ecp6	Passalora fulva	Bolton et al., 2008 Mol Microbiol, The novel Cladosporium fulvum lysin motif effector Ecp6 is a virulence factor with orthologues in other fungal species	http://onlinelibrary.wiley.com/doi/10.1111/j.1365-2958.2008.06270.x/abstract;jsessionid=F48ED147265653CBC254CA7673DF15EC.f01t02	MQSMILFAAALMGAAVNGFVLPRTDDPDCETKATDCGSTSNIKYTVVKGDTLTSIAKKFKSGICNIVSVNKLANPNLIELGATLIIPENCSNPDNKSCVSTPAEPTETCVPGLPGSYTIVSGDTLTNISQDFNITLDSLIAANTQIENPDAIDVGQIITVPVCPSSQCEAVGTYNIVAGDLFVDLAATYHTTIGQIKALNNNVNPSKLKVGQQIILPQDCKNVTTAVA
Fungal	cytoplasmic	G0X6Y1	AEK82122	SP7	Glomus intraradices	Kloppholz et al, 2011 Curr Biol, A Secreted Fungal Effector of Glomus intraradices Promotes Symbiotic Biotrophy	http://www.sciencedirect.com/science/article/pii/S0960982211007172	MKFTTLACLAILGISTLNEVNAAPIAEIGLNNKRDSTPSYDYKDKKDKKDDYYGGKDDEYYGSKDDDYYGGKDDKYDDDKKKSSYRRSALASPGDKDDDYYGGKDDDYYGGKDDDYYGGKDDKYDDDKKKSSYKRSALASPGDKDDDYYGGKDDDYYGSKDDDYYGGKDDKYDDKKKSSYKRSASPGDKDDDYYGSKDDDYYGSKDDDYYGGKDDKYDDDKKKSSYRRSALASPGDKDDDYYGSKDDDYYGSKDDDYYGGKDDKYDDDKKKSSYKRSASPGDKDDDYYGSKDDDYYGGKDDKYDDKKKSSY
Fungal	cytoplasmic	Q709D8	ACY39281, CAE55870	Six1(Avr3)	Fusarium oxysporum f. sp. lycopersici	Rep et al., 2004, Mol. Micro, A small, cysteine-rich protein secreted by Fusarium oxysporum during colonization of xylem vessels is required for I-3-mediated resistance in tomato	http://onlinelibrary.wiley.com/doi/10.1111/j.1365-2958.2004.04177.x/abstract;jsessionid=9521A428C31208DE3C85306DF3EEEB8D.f04t03	MAPYSMVLLGALSILGFGAYAQEAAVREPQIFFNLTYTEYLDKVAASHGSPPDKSDLPWNDTMGSFPGNETDDGVQTETGSSLSRRGHIVNLRKREPFGEESRNDRVTQDMLQALHDLCVERFGTGYRAVSGLCYTDRRATRKIECNKPSVRERDRSVTRACPKGQECTTFNAYNFRNRHHQVTFPVCGPRIEVKDRHDIGIHTEWQGTWYPESPKSPGTYDYFAQMAGTLNGYFGYDGVYSDGYKTSSHGYGHSWSCINCPRGKVTITNTYRATWAFGYTSPH
Fungal	unknown	Q709E0	ACY39282, CAE55868	Six2	Fusarium oxysporum f. sp. lycopersici	Lievens et al., 2009, FEMS Microbiology Letters, Effector gene screening allows unambiguous identification of Fusarium oxysporum f. sp. lycopersici races and discrimination from other formae speciales	http://femsle.oxfordjournals.org/content/300/2/201	MLFKIAWVSLFTTWAISVAANPAGDSLPDDAHLPDRRLSPSEVQALKKAQIYPPGYIHKRVTFGEGKDAVEVPIVEADVEMLLNNEKGVKARSLAPRGSCFSFPTPARGSCMIDYCWRDDNGVIYSRGITITGSNGASNPTSMRSNDPANLSLNSVFNDGYNGWFPHGHACSNSDTQIYTNHRLLQGVNGVAYVDHVRCENCNFRNVNCLSDVLKNNLIAYSNGVASQSRCT
Fungal	unknown	Q2A0P1	ACY39283, CAJ83999	Six3(Avr2)	Fusarium oxysporum f. sp. lycopersici	Houterman et al., 2007, Mol Plant Plath, The mixed xylem sap proteome of Fusarium oxysporum-infected tomato plants.	http://www.ncbi.nlm.nih.gov/pubmed/20507493	MRFLLLIAMSMTWVCSIAGLPVEDADSSVGQLQGRGNPYCVFPGRRTSSTSFTTSFSTEPLGYARMLHRDPPYERAGNSGLNHRIYERSRVGGLRTVIDVAPPDGHQAIANYEIEVRRIPVATPNAAGDCFHTARLSTGSRGPATISWDADASYTYYLTISED
Fungal	unknown	Q2A0P0	ACY39284, BAM37636, CAJ84000	Six4(Avr1)	Fusarium oxysporum f. sp. lycopersici	Houterman, P. M., et al. (2008). "Suppression of Plant Resistance Gene-Based Immunity by a Fungal Effector." PLoS Pathog 4(5): e1000061.	http://journals.plos.org/plospathogens/article?id=10.1371/journal.ppat.1000061#ppat-1000061-g004	MNLKALVVIASVAVTSALPKGEEGDIIGTFNFSSSDSQPLKIHWVDTPDSSGSNLVKRSAHTESVCVHAGTATGADLHWLNAICTGKSTYTVNCAPAGNKNAGSTHTGTCPAGQDCFQLEQVGNFWGDREPDATCSPSNTVFDAVDDKEATHVNGKVVTRAGKPGIGRKLIRLKAQVYRRDGHYGQTSRMGFFRNGKEVYHIDNVASMEPTWNFDPSSDQSFSFFFTPGPNAFRIQGTLNLA
Fungal	unknown	C0LT61	ACN87967, ACY39285	Six5	Fusarium oxysporum f. sp. lycopersici	Ma, L., et al. (2015). "The AVR2–SIX5 gene pair is required to activate I-2-mediated immunity in tomato." New Phytologist	http://femsle.oxfordjournals.org/content/300/2/201	MRFEYISVLALCGASLARDHQYCACQSGSGDSIDIDATTQLQNDNSKSYLWAQTSPAYWFADRHKPGPRFAGIYLKAANGKIDGDTFYNLCINNGGADSTCFDCSKSHQVRNVIYCDAA
Fungal	unknown	C9WMG8	ACN69116, ACY39286	Six6	Fusarium oxysporum f. sp. lycopersici	Lievens et al., 2009, FEMS Microbiology Letters, Effector gene screening allows unambiguous identification of Fusarium oxysporum f. sp. lycopersici races and discrimination from other formae speciales	http://femsle.oxfordjournals.org/content/300/2/201	MKLALIASILAAGCVAGPLAQTESESADVAEHTINYIDIAPEEFEPPKANLSSLVSRDTLPVSTCPAGQKYDRSVCYKADKIRSFCVANPRSNREKITDTPCQPREICVQRNLSNGKSFAKCIPIVDLVEWKTSANGNKEGCTTTSVNPAGYHHLGTIVYDINKNPIEVDKISYFGEPGNVNEGIGGSTSYFSSDNFQFSKSRYMKSRDMRTFMT
Fungal	unknown	C9WMG9	ACN69117, ACY39287, AIY35187	Six7	Fusarium oxysporum f. sp. lycopersici	Lievens et al., 2009, FEMS Microbiology Letters, Effector gene screening allows unambiguous identification of Fusarium oxysporum f. sp. lycopersici races and discrimination from other formae speciales	http://femsle.oxfordjournals.org/content/300/2/201	MQVMKYLYLLFHFALFASAIPMLDLFPRQGQCFSTTGSTPPRPPPAAREVTFDITQNVNTFTSAASTPWTEGVGLSNIRYQWRAYYSTRQRTTFVEVRVFGTAEAQVVLLPDAPGTSRYRAIDSNVFRPNEEVTGGGLAGWGQVTTVCLQTWGRRGDITYRLRIQSKPKHSYPLEVIPERQYANRLMNARCYAKTHQMIYKPRGLADFRFHRLTQSVVNL
Fungal	cytoplasmic	B0DD66	EDR07554	MiSSP7.2	Laccaria bicolor	Plett et al., 2014, PNAS, Effector MiSSP7 of the mutualistic fungus Laccaria bicolor stabilizes the Populus JAZ6 protein and represses jasmonic acid (JA) responsive genes Plett et al., 2011, Curr Biol, A Secreted Effector Protein of Laccaria bicolor Is Required for Symbiosis Development	http://www.pnas.org/content/111/22/8299	MKLLVPLNLLIAALAISPALSSPVPGEVGLVERGPIPNAVFRRVPEPNFFKDLLRALGQASQGGDLHR
Fungal	unknown	Q258K5	CAJ29326	AvrLm1	Leptosphaeria maculans	Gout et al., 2006. Mol. Micr, Lost in the middle of nowhere: the AvrLm1 avirulence gene of the Dothideomycete Leptosphaeria maculans	http://onlinelibrary.wiley.com/doi/10.1111/j.1365-2958.2006.05076.x/abstract	MVQFKTIFLSTALAALFSTGSSSPATKNNVNQPLDNISRRSEWKSVQISPVKEHSAKTADNTENNHNLEKRVFTSPHMKRTFTLALENTFYAMAWLIDFSFSDDGEPHFSYKLQSFNHEDNPPKILADVVVPLITTSYNSANQYRGKANVELLCHLAKEYVHVYFSVEVFASGASFVIGKIIDYPTVYVNNQFRKVVKFDIAGAI
Fungal	cytoplasmic	B9ZUL0	CAQ53119	AvrLm4-7	Leptosphaeria maculans	Parlange et al, 2009, Mol. Microbiol, Leptosphaeria maculans avirulence gene AvrLm4-7 confers a dual recognition specificity by the Rlm4 and Rlm7 resistance genes of oilseed rape, and circumvents Rlm4-mediated recognition through a single amino acid change	http://onlinelibrary.wiley.com/doi/10.1111/j.1365-2958.2008.06547.x/abstract	MPLSLEIILTLLALSIPTITACREASISGEIRYPQGTCPTKTEALNDCNKVTKGLIDFSQSHQRAWGIDMTAKVQCAPCITTDPWDVVLCTCKITAHRYREFVPKIPYSSFSSAPGVIFGQETGLDHDPEWVVNMKARTRGCD
Fungal	cytoplasmic	A4F4L2	CAJ90695	AvrLm6	Leptosphaeria maculans	Fudal et al, 2007, MPMI, Heterochromatin-Like Regions as Ecological Niches for Avirulence Genes in the Leptosphaeria maculans Genome: Map-Based Cloning of AvrLm6	http://apsjournals.apsnet.org/doi/abs/10.1094/MPMI-20-4-0459	MVIYLPLYLLVLGIATTTISQPHLLCACESGRRDGVDDTRTLKVVKGTGGRFVFSSRYWTKAEGAPHEGNYAHAINGTITKKGTNIQAHDDGLIGGEEMNSLCPEHSTCFSPNLKAKSTHSCGPDGKYGCVSAWLSVNWEGQIQ
Fungal	unknown	E4ZT77	CBX90019	AvrLm11	Leptosphaeria maculans	Balesdent MH, Fudal I, Ollivier B, Bally P, Grandaubert J, Eber F, Chèvre AM, Leflon M, Rouxel T. The dispensable chromosome of Leptosphaeria maculans shelters an effector gene conferring avirulence towards Brassica rapa. New Phytol. 2013 May;198(3):887-98	http://www.nature.com/ncomms/journal/v2/n2/full/ncomms1189.html	MRFLLPIFSATLAFAINEAFEGRPCCQKWIEQCKLEGAVGCMLADYNYCVVPSSTCQEQCNGFFGRNGRSTHGRDTEYVYQIHNMYTANEKDPTC
Fungal	unknown	H9DUR1	AEZ51498, AFB18185, AFB18186, AFB18187, AFB18188	Ave1	Verticillium dahliae	de Jonge et al., 2012, PNAS, Tomato immune receptor Ve1 recognizes effector of multiple fungal pathogens uncovered by genome and RNA sequencing	http://www.pnas.org/content/109/13/5110.long	MKLSTLGALISLTSLVTADLGTASYYNPPYLPTACGGSNPSQFPSGNLFVAVSDGLWDNGAACGRRYRIKCLSGARGSCKDGMIDVRVVDRAKTTVTKAAHKATMILSQDSYDAIVNQWKGTRHKAVNIEFRQI
Fungal	cytoplasmic	R9RX08	AGM61352	AVR-Pia	Magnaporthe oryzae	Cesari et al 2013, Plant Cell, The Rice Resistance Protein Pair RGA4/RGA5 Recognizes the Magnaporthe oryzae Effectors AVR-Pia and AVR1-CO39 by Direct Binding	http://www.plantcell.org/content/25/4/1463	MHFSTIFIPFALAALKVSAAPARSCVYYDGHLPATRVLLMYVRIGNTATITARGHEFEVEAKDQNCKVILTNGKQAPDWLAAEPY
Fungal	apoplastic	Q4PET8 (deprecated)	KIS71480	Pit2	Ustilago maydis	Mueller, A. N., S. Ziemann, S. Treitschke, D. Aßmann and G. Doehlemann (2013). "Compatibility in the Ustilago maydis–Maize Interaction Requires Inhibition of Host Cysteine Proteases by the Fungal Effector Pit2." PLoS Pathog 9(2): e1003177.	http://journals.plos.org/plospathogens/article?id=10.1371/journal.ppat.1003177	MLFRSAFVLLIVAFASACLVQHVQAIPVRRSLSTDASMSSAAGKLNRRWWFGFTGSLGKEPDNGQVQIKIIPDALIIKNPPANKDDLNKLIENLKRKHPRFKTVVMPTDPNGDVVIWE
Fungal	cytoplasmic	Q4PCC4 (deprecated)	EAK83361	See1	Ustilago maydis	Redkar, A., R. Hoser, L. Schilling, B. Zechmann, M. Krzymowska, V. Walbot and G. Doehlemann (2015). "A Secreted Effector Protein of Ustilago maydis Guides Maize Leaf Cells to Form Tumors." The Plant Cell 27(4): 1332-1351.	http://www.plantcell.org/content/27/4/1332.long	MLFTTFVSLLLVILCLVHVSAHPLQSFRSSSAIGKQKHKIKSRQFEEEIAQGAEDSIELFEFPRVHDSSEQIHERTEQQNITTKNIILAINKNSRKHGGLHRLPAQVQGEGEFTYDRQRNAVGSYRYGDSHGNSREAEYSVADHQSASGEYKFGPTT
Fungal	cytoplasmic	G4NJP7	EHA46463	AvrPi9	Magnaporthe oryzae	Wu, J., Y. Kou, J. Bao, Y. Li, M. Tang, X. Zhu, A. Ponaya, G. Xiao, J. Li, C. Li, M.-Y. Song, C. J. R. Cumagun, Q. Deng, G. Lu, J.-S. Jeon, N. I. Naqvi and B. Zhou (2015). "Comparative genomics identifies the Magnaporthe oryzae avirulence effector AvrPi9 that triggers Pi9-mediated blast resistance in rice." New Phytologist 206(4): 1463-1475.	http://onlinelibrary.wiley.com/doi/10.1111/nph.13310/abstract	MQFSQILTVLFLGVSVSALPAGGLPGSPGSAVQRCHCPPRGSHAHGSLAAREEAPEAEGDAKISARYTCPNCHKTGKGCDDGWCQVEKTHW
Fungal	cytoplasmic	C4B8B7	BAH59485	AVR-Pii	Magnaporthe oryzae	Yoshida et al, 2009, Plant Cell, Association Genetics Reveals Three Novel Avirulence Genes from the Rice Blast Fungal Pathogen Magnaporthe oryzae	http://www.plantcell.org/content/21/5/1573.full.pdf+html	MQLSKITFAIALYAIGIAALPTPASLNGNTEVATISDVKLEARSDTTYHKCSKCGYGSDDSDAYFNHKCN
Fungal	cytoplasmic	C4B8B8	AFJ38177, BAH59486, BAP47454	AVR-Pik	Magnaporthe oryzae	Yoshida et al, 2009, Plant Cell, Association Genetics Reveals Three Novel Avirulence Genes from the Rice Blast Fungal Pathogen Magnaporthe oryzae	http://www.plantcell.org/content/21/5/1573.full.pdf+html	MRVTTFNTFLLTLGTVAVVNAETGNKYIEKRAIDLSRERDPNFFDHPGIPVPECFWFMFKNNVRQDAGTCYSSWKMDMKVGPNWVHIKSDDNCNLSGDFPPGWIVLGKKRPGF
Fungal	cytoplasmic	C1KJG7	ACO58447, BAJ15037, BAK40871	AVR-Pita	Magnaporthe oryzae	Dai et al., 2010, FGB, Diversification and evolution of the avirulence gene AVR-Pita1 in field isolates of Magnaporthe oryzae	http://www.sciencedirect.com/science/article/pii/S1087184510001490	MLFYSLLFFFHTVAISAFTNIGTFSHPVYDYNPIPNHIHGDLKRRAYIERYSQCSDSQASEIRAALKSCAELASWGYHAVKSNNRLFKLIFKTDSTDIQNWVQNNFNEIYKECNRDADEISLTCHDKNVYTCVREEVHNLAYALINEKEIVICPPFFNNPVNSREITAGNQDTIILHEMVHIILKEWKDYGCEWDGIHKLDSTESIRNPDSYAIFAQCARYKYC
Fungal	cytoplasmic	F7J181	BAK40880	AVR-Pita2	Magnaporthe oryzae	Chuma et al., 2011, PLoS Pathogens, Multiple translocation of the AVR-Pita effector gene among chromosomes of the rice blast fungus Magnaporthe oryzae and related species	http://journals.plos.org/plospathogens/article?id=10.1371/journal.ppat.1002147	MLFYSFIFYFHTVAISAFTNIGTFSYPVYNSNPIPNHIHGDLKRRAYIEPYSQCSNSQDSEIRAALKSCAELASWAYHAVENDNRLFELIFKTDSTNIKNWVQNNFNEIHKECNRDADEISLSCHDTSVYTCVREGVHLLGYAKMYEKQVVLCPHFFDHPVNSREITAQNQDTVILHEMLHIILNEWEDYGYEWDGIHNLDSTTSIKNPDSYAIFAQCARYKYC
Fungal	cytoplasmic	Q8J180	AAO14615	Avr1-CO39	Magnaporthe oryzae	Ribot et al, 2013,Plant J., The Magnaporthe oryzae effector AVR1–CO39 is translocated into rice cells independently of a fungal-derived machinery	http://onlinelibrary.wiley.com/doi/10.1111/tpj.12099/abstract;jsessionid=4A92188F35B160C2109698774EFC9F50.f02t01	MKVQATFATLIALAAYFPAANAWKDCIIQRYKDGDVNNIYTANRNEEITIEEYKVFVNEACHPYPVILPDRSVLSGDFTSAYADDDESC
Fungal	cytoplasmic	H2DQR0	AEX97148, CCC41985, CCD21890, CCD21891, CCD21894, CCD21896, CCD21897, CCD21899, CCD21901, CCD21903, CCD21905, CCD21907, CCD21910, CCD21911, CCD21912, CCD21914, CCD21916, CCD21918, CCD21920, CCD21922, CCD21924, CCD30939, CCD30940, CCD30941, CCD30942, CCD30944, CCD30945, CCD30946, CCD30947, CCD30948, CCD30949, CCD30950, CCD30951, CCD30952, CCD30953, CCD30954, CCD30955, CCD30956, CCD30957, CCD30958,…	AvrPiz-t	Magnaporthe oryzae	Park et al., 2012, Plant Cell,The Magnaporthe oryzae Effector AvrPiz-t Targets the RING E3 Ubiquitin Ligase APIP6 to Suppress Pathogen-Associated Molecular Pattern–Triggered Immunity in Rice	http://www.plantcell.org/content/24/11/4748.long	MQFSTIITVCLFTGLASASFVQCNHHLLYNGRHWGTIRKKAGWAVRFYEEKPGQPKRLVAICKNASPVHCNYLKCTNLAAGFSAGTSTDVLSSGTVGSIGNDPQAQRQ
Fungal	cytoplasmic	G5EHI7	ACQ73206, EHA58149	Bas1	Magnaporthe oryzae	Khang et al., 2010,Translocation of Magnaporthe oryzae Effectors into Rice Cells and Their Subsequent Cell-to-Cell Movement	http://www.plantcell.org/content/22/4/1388	MHVFNFAALFTVLATFTATAAAADQGSNTFDQRYQGYPWRPANGPIREEKQENVGHRRGGAEYFTSGSPSIAAEDYSAKNAPSRFEQWKAQQKERAERKQDRGLNGIRRVENYYP
Fungal	cytoplasmic	G4N9C5	EHA51166	Bas107	Magnaporthe oryzae	Giraldo et al., 2012, Nature Comm., Two distinct secretion systems facilitate tissue invasion by the rice blast fungus Magnaporthe oryzae	http://www.nature.com/ncomms/2013/130618/ncomms2996/pdf/ncomms2996.pdf	MHAFKFVQIWALLAIGAAAIPTPINLPAALTSQLEPRAEGGASAGDANNIQPQSQEKSPFICVWCGKDKGGSSALIGHEIHNHQDDEMVAWTGRDRRLNKYETDKEGYRYFKKYPGVRLPNRTWKGKGKRPE
Fungal	cytoplasmic	G5EI08	ACQ73207, EHA51344	Bas2	Magnaporthe oryzae	Mosquera et al., 2009, Plant Cell, Interaction Transcriptome Analysis Identifies Magnaporthe oryzae BAS1-4 as Biotrophy-Associated Secreted Proteins in Rice Blast Disease	http://www.plantcell.org/content/21/4/1273	MVRVSTFAAILAMALSVTANVTPNDAGAKNVGTGNGQQFITGGCVNGTDCQSRCCAGNGENKGVCSNEVAANQNGKTGCGFEDPNKAQTVKEAKEQVKKQGF
Fungal	unknown	G5EHH0	ACQ73208, EHA49227	Bas3	Magnaporthe oryzae	Mosquera et al., 2009, Plant Cell, Interaction Transcriptome Analysis Identifies Magnaporthe oryzae BAS1-4 as Biotrophy-Associated Secreted Proteins in Rice Blast Disease	http://www.plantcell.org/content/21/4/1273	MQFSTVSFAIFAILPAMVAAMPAETSPVPKPALPVFEELCPDAERQKCAESTDNLKRCLQINGASICVIDCGSQTTCRTQCKQQLKNEKANGFCTVGDNPCICNLNGAANSAH
Fungal	apoplastic	G5EI20	ACQ73209, EHA48095	Bas4	Magnaporthe oryzae	Mosquera et al., 2009, Plant Cell, Interaction Transcriptome Analysis Identifies Magnaporthe oryzae BAS1-4 as Biotrophy-Associated Secreted Proteins in Rice Blast Disease	http://www.plantcell.org/content/21/4/1273	MQLSFSAIAILLAFAVNHATADSHQNLVCVRTYPDNNSAENLEATRCACDWLKKNGKCDDCTIWENRLCHSDAKSLDGNEFEDACVRKCPNLGATGSSIPPA
Fungal	apoplastic	G5EI17	EAQ71199, EHA46146	MC69	Magnaporthe oryzae	Saitoh et al., 2012, PLoS Pathogens, Large-scale gene disruption in Magnaporthe oryzae identifies mc69, a secreted protein required for infection by monocot and dicot fungal pathogens	http://journals.plos.org/plospathogens/article?id=10.1371/journal.ppat.1002711	MKAAFVLALCASLASAWVVITPITKEMVVDRSPDDCFFGVVTPQGCGPLRGPAK
Fungal	cytoplasmic	B9A9V1	BAH22184	Pwl1	Magnaporthe oryzae	Kang et al., 1995, MPMI, The PWL host specificity gene family in the blast fungus Magnaporthe grisea.	http://www.apsnet.org/publications/mpmi/backissues/Documents/1995Articles/Microbe08-939.pdf	MKFNKTIPLYILAFFSTAVIAGGRKWTNKVIYNDKGEREGSISIRKGAEGDFNCGPGYPGGPDRMVRVHEDNGNIRGMPPGYRLGPDDKEDKRDNQYYSRNGYHVGDGPAEYQNHGGGQWGDGYYGPPGEITNQHGKRQGDQGCHIM
Fungal	cytoplasmic	Q01144	AAA91019	Pwl2	Magnaporthe oryzae	Khang et al., 2010, Plant Cell, Translocation of Magnaporthe oryzae Effectors into Rice Cells and Their Subsequent Cell-to-Cell Movement	http://www.plantcell.org/content/22/4/1388	MKCNNIILPFALVFFSTTVTAGGGWTNKQFYNDKGEREGSISIRKGSEGDFNYGPSYPGGPDRMVRVHENNGNIRGMPPGYSLGPDHQEDKSDRQYYNRHGYHVGDGPAEYGNHGGGQWGDGYYGPPGEFTHEHREQREEGCNIM
Fungal	unknown	Q01150	AAA80240	Pwl3	Magnaporthe oryzae	Kang et al., 1995, MPMI, The PWL host specificity gene family in the blast fungus Magnaporthe grisea.	http://www.apsnet.org/publications/mpmi/backissues/Documents/1995Articles/Microbe08-939.pdf	MKINTSILALTLALLPGMATAGRKWLNKKLWDANGQSAGSVSIVKGGQGSINTDTGPITAEGSYDIYERNGKIEGGPPGYKYTEDRYEDRKDDRYYNTHGYHVGDGPAEYGNYGGGHWGDGYYGPPGEFVKTSEYDD
Fungal	unknown	Q01152	AAA80241	Pwl4	Magnaporthe oryzae	Kang et al., 1995, MPMI, The PWL host specificity gene family in the blast fungus Magnaporthe grisea.	http://www.apsnet.org/publications/mpmi/backissues/Documents/1995Articles/Microbe08-939.pdf	MKINTSILALALALLPGMATAGRKWFNKKIYDENGESAGSLSVVKGGSGYINIGPSAPGQRDRLVEFRESGGKIQGGPPGYRYTSDHEEDQRDNRYYNTHGYHVGDGPAEYGDHGGGHWGDGYYGPPGEFVKTSEYED
Fungal	apoplastic	G4N906	EHA51101	Slp1	Magnaporthe oryzae	Mentlak et al., 2012, Plant Cell, Effector-Mediated Suppression of Chitin-Triggered Immunity by Magnaporthe oryzae Is Necessary for Rice Blast Disease	http://www.plantcell.org/content/24/1/322.long	MQFATITTLLFAGVAAAMPQATPTSAAPPSATSTCTPGPVVDYTVQGNDTLTIVSQKLNSGICNIATLNNLANPNFIALGAVLKVPTAPCVIDNISCLAKQSDNNTCVSGVSPYYTIVSGDTFFLVAQKFNLSVDALQAANVGADPLLLQLNQVINIPICKN
Fungal	cytoplasmic	Q6R661	AAS66948	AvrL567-A	Melampsora lini	Dodds et al., 2007, Plant Cell, The Melampsora lini AvrL567 Avirulence Genes Are Expressed in Haustoria and Their Products Are Recognized inside Plant Cells	http://www.plantcell.org/content/16/3/755	MKINLSWKTYAVLSIVSLGGIHAMEHVPAELTRVSEGYTRFYRSPTASVILSGLVKVKWDNEQMTMPLFKWIGGEQAEELHFCVHIAHSSGPKLNRARSLGTVNSNMDQHWAQAQRNSGATRRTIEGFHLFENDIPNFPDYIKIKLVPKT
Fungal	cytoplasmic	Q6R659	AAS66949	AvrL567-B	Melampsora lini	Dodds et al., 2007, Plant Cell, The Melampsora lini AvrL567 Avirulence Genes Are Expressed in Haustoria and Their Products Are Recognized inside Plant Cells	http://www.plantcell.org/content/16/3/755	MKINLSWKTYAVLSIVSLGGIHAMEHVPAELTGVSEGYTRFYRSSTASVILSGLVKVKWDNEQMTMPLFKWIGGEQAEELHFDVHIAHSSGRRLDRARTLGAVNSNMDQHWVEAYRSSGVTRCTIQDCHLFENDIPNFPDYIKIKLVPKT
Fungal	cytoplasmic	Q6R656	AAS66953	AvrL567-C	Melampsora lini	Dodds et al., 2007, Plant Cell, The Melampsora lini AvrL567 Avirulence Genes Are Expressed in Haustoria and Their Products Are Recognized inside Plant Cells	http://www.plantcell.org/content/16/3/755	MKINLSWKTYAVLSIVSLGGIHAMEDVPAELTRVSEGYTRFYRSPTASVTLSGLVDVKWDNEQMTMPLFKWIGKEQAEELHFDVHLAHSSGRRLNSARILGAVNSNMDQHWVEAYRSSGVIRCTIQDCHLFANDIPNFPEYIKIKLVPKT
Fungal	cytoplasmic	Q2MV46	ABB96264	AvrM	Melampsora lini	Catanzariti et al., 2006, Plant Cell, Haustorially Expressed Secreted Proteins from Flax Rust Are Highly Enriched for Avirulence Elicitors	http://www.plantcell.org/content/18/1/243	MMMISTKSKLRNIFLLLAIANVNFCVKGHPMNSAKLAEEVKDGVNQPEFDRGFLRPFGAKMKFLKPDQVQKLSTDDLITYMAEKDKNVRDLAIKLRDAKQDSTKNGTPEIKQKYDKAYEKTKAAAEKLVSEESLTRDALLELTEEQYVEKAALFDKDVYRNNLQRQTYERLLRSETDVSYREVARTFIAREGEPALNAKIERLALTLENNADTRSKLDYLAIAADFLKNQANLHADDPELNLYKAETKAREIKANRAMKEALEGADKLFERNKILKSPDMRYKSAGFQAFIDKMMAWLSKIMTTKSYIKSLAKP
Fungal	cytoplasmic	Q2MV43	ABB96267, ACD49718	AvrP123	Melampsora lini	Catanzariti et al., 2006, Plant Cell, Haustorially Expressed Secreted Proteins from Flax Rust Are Highly Enriched for Avirulence Elicitors	http://www.plantcell.org/content/18/1/243	MLFKQCTALKFLIFILGFSIIAAQYVVDPGFGEIECMCGQIARLTQRPFDVECEATPSCSCDYRGDCPGPAAEYVYRCPTCGPRSHVGCFGVHQGTCEEVHPGIARVQYQNSDSESE
Fungal	cytoplasmic	Q2MV49	ABB96261, ACD49709	AvrP4	Melampsora lini	Catanzariti et al., 2006, Plant Cell, Haustorially Expressed Secreted Proteins from Flax Rust Are Highly Enriched for Avirulence Elicitors	http://www.plantcell.org/content/18/1/243	MLIMMGIPLRKIVLLSLIFGISIIPMMCEFLEDARDIQGFSRKSGSKLEEESDSSRDRQEKQAEAQKCTDISCNSNAQCSGQKCGDCLLEGNCSG
Fungal	apoplastic	F9XMT4	EGP83639	Mg3LysM	Zymoseptoria tritici	Marshall, R., Kombrink, A., Motteram, J., Loza-Reyes, E., Lucas, J., Hammond-Kosack, K. E., Thomma, B. P. H. J., and Rudd, J. J. 2011. Analysis of two in planta expressed LysM effector homologs from the fungus Mycosphaerella graminicola reveals novel functional properties and varying contributions to virulence on wheat. Plant Physiol.	http://www.plantphysiol.org/content/156/2/756.long	MQNIFLAATLLGAAFAAPQNPPTSCSAAPQPTGTGSPGTVCGSTTFTNYTVKAGDTLGAIAKQYNSGVCDIAKVNGIDNPDYIKPDQVLSIPANCVTPDNTSCVKPVPVITNTCVLGVGSTYTVKSGDSFSAIATSFNITLASLEARNPQIPNYDLIFPGQVINTPLCPNSVCDSIGTYVIESGDIFYNLAQSNNVTVGQLESLNVNVNVTDIHPGDIIILPHNCHNITASA*
Fungal	unknown	H2E5X4	AEX93346, AEX93355	Tox1	Phaeosphaeria nodorum	Liu et al., 2012, PLoS Pathogens, The cysteine rich necrotrophic effector SnTox1 produced by Stagonospora nodorum triggers susceptibility of wheat lines harboring Snn1	http://journals.plos.org/plospathogens/article?id=10.1371/journal.ppat.1002467	MKLTMVLSVAFATLTFANEGILTFEGLGLARRQTICHTPGGSGCRASISGDQCCCTSCTPEDCSDLCKNGKQAAHEAQNQKKCAKCCNAGGESHELCCSIASAGIDCNPCPAGLRMC
Fungal	unknown	C5IAW5	ACR78113	Tox3	Phaeosphaeria nodorum	Liu et al., 2009, PLoS Pathogens, SnTox3 Acts in Effector Triggered Susceptibility to Induce Disease on Wheat Carrying the Snn3 Gene	http://journals.plos.org/plospathogens/article?id=10.1371/journal.ppat.1000581	MHFTKFLLVVQAAATAIALALEPRGPGDIQLTREEHEAIFNGSPSDWTEDPNFKPDVPEQQRPATANDLSKRYIKANDINFGTRSVHDCRERTGIQRDVKVRADIPFETDDGPNQVLRVTWSNALNVDRFDPLPIVTVPGNAASTTITAIHDFCLMNPTTSPPTRCLYQLRQPFTLGFDRTRMHNNIYLTPPNPQRPTMHEVCIRADECPAGRVFLECSTRTYGAIPRGE
Fungal	cytoplasmic	Q0TVA4	EAT76059	ToxA	Phaeosphaeria nodorum	Friesen et al., 2006 , Nature Genetics, Emergence of a new disease as a result of interspecific virulence gene transfer	http://www.nature.com/ng/journal/v38/n8/abs/ng1839.html	MRSILVLLFSAAAVLAAPTPEADPGYEIVKLFEAANSSELDARGLSLDWTLKPRGLLQERQGSCMSITINPSRPSVNNIGQVDIDSVILGRPGAIGSWELNNFVTIGLNRVNANTVRVNINNTGRTNRLIITQWDNTLTRGDVYELFGDYALIQGRGSFCLNIRSDSGRENWRMQLEN
Fungal	unknown	E3KGM7	EFP83452	PGTAUSPE-10-1	Puccinia graminis f. sp. tritici	Upadhyaya et al., 2014, MPMI, A Bacterial Type III Secretion Assay for Delivery of Fungal Effector Proteins into Wheat	http://apsjournals.apsnet.org/doi/abs/10.1094/MPMI-07-13-0187-FI	MHARQLVTILSICLSQAHARSIPTVSDPLEPIVRLVTTPHEVLGAAPDLKETEKAAIQQSPYLYSHQIAAGLAETTDSLHYLSSEPQTAFSSLMAGSLLGYYRTIMQDLPKETKESRLQIYRNSFYSRTRDVANHMGPEVWNTHATLAKKSLENGLQDVVLEFQKSQMTPAGDEKILNRIEILAQKFKNSKKHQEIMEEISKAVAHMKTHLPYNVNLGEMKYLSAEEVESALKGTNIGGHPDAIPVNYFLVHHEPATHQISPAKTPITNSRQAQLPPSQPKVATAPTAAAAA
Fungal	apoplastic	Q02039	AAA86496, AAS84327, AAS84328, AAS84330, AAS84332, AAS84333, AAS84335, AAS84337, AAS84342, AAS84348, AAS84354, AAS84360, AAS84366, AAS84382, AAS84383, AAS84385, AAS84387, AAS84388, AAS84391, AAS84392, AAS84394, AAS84395, AAS84396, AAS84399, AAS84401, AAS84405, AAS84406, AAS84407, AAS84408, AAS84409, AAS84410, AAS84411, AAS84413, AAS84415, AAS84416, AAS84418, AAS84421, AAS84423, AAS84440, ABR92629	NIP1	Rhynchosporium secalis	Rohe et al., 1995, EMBO J, The race-specific elicitor, NIP1, from the barley pathogen, Rhynchosporium secalis, determines avirulence on host plants of the Rrs1 resistance genotype.	http://www.ncbi.nlm.nih.gov/pmc/articles/PMC394499/	MKFLVLPLSLAFLQIGLVFSTPDRCRYTLCCDGALKAVSACLHESESCLVPGDCCRGKSRLTLCSYGEGGNGFQCPTGYRQC
Fungal	unknown	I1VGT7	AFI43935, AGW29190, AGW29191, AGW29192, AGW29193, AGW29194, AGW29195, AGW29196, AGW29197, AGW29198, AGW29199, AGW29200, AGW29201, AGW29202, AGW29203, AGW29204, AGW29205, AGW29206, AGW29207, AGW29208, AGW29209, AGW29211, AGW29212, AGW29213, AGW29214, AGW29219, AGW29225, AGW29228, AGW29256, AGW29257, AGW29258, AGW29259, AGW29260, AGW29261, AGW29262, AGW29263, AGW29264, AGW29265, AGW29266, AGW29267,…	NIP2	Rhynchosporium secalis	Kirsten et al., 2012, MPMI, Necrosis-Inducing Proteins of Rhynchosporium commune, Effectors in Quantitative Disease Resistance	http://apsjournals.apsnet.org/doi/abs/10.1094/MPMI-03-12-0065-R	MKYLSILTACVAVTHAYYVVVCVPRDGAEIGDVEWAIQNRRHDLALGGKGFWRGHSTSCHRNANAVVDVVALCRSDPYIGAHPTVLKYGASVLCQASGAPDWPTCTVNC
Fungal	unknown	I1VGT8	AFI43936, AGW29312, AGW29321, AGW29322, AGW29323, AGW29324, AGW29325, AGW29327, AGW29328, AGW29330, AGW29332, AGW29333, AGW29339, AGW29340, AGW29341, AGW29363, AGW29364, AGW29365, AGW29374, AGW29376, AGW29381, AGW29382, AGW29384, AGW29385, AGW29387, AGW29389, AGW29390, AGW29391, AGW29392, AGW29393, AGW29395, AGW29397, AGW29398, AGW29401, AGW29402, AGW29404, AGW29414, AGW29416, AGW29417, AGW29418,…	NIP3	Rhynchosporium secalis	Kirsten et al., 2012, MPMI, Necrosis-Inducing Proteins of Rhynchosporium commune, Effectors in Quantitative Disease Resistance	http://apsjournals.apsnet.org/doi/abs/10.1094/MPMI-03-12-0065-R	MLPKTLIICLLATTAQAACGDVYTIKGNCTIRDYKCKYPRVPSCNSKGACPYLHLFDVPIFCDQDKDCVTSYKCNKNYKRSPLNLGPFYEDGDLVAKEEGEGGEGDSELVEEDDE
Fungal	cytoplasmic	Q334H6	CAI96535	RTP1	Uromyces fabae	Kemen et al., 2005, MPMI, Identification of a protein from rust fungi transferred from haustoria into infected plant cells	http://apsjournals.apsnet.org/doi/abs/10.1094/MPMI-18-1130	MSNLRLLFTIISLAAIARAQLVGSDVVLVRTSHQSMGKASVSYCREMTRQHHKRELDQDANPGHRRHKSEPEGVKPSNHTSAPTPSSPPLTTVDLTPAKLNTACYPGTFQAPLLEDCEVVIRAQLYNSTGSLQVSPGDYVFVSYGTCATVFQNPQYSKYSLQYNWAELGYVGGKLAGRCLLPEDHSMGGTAVFDTYLGRTYPDVIISLQRFDDRDFIIPE
Fungal	cytoplasmic	Q4P6P3 (deprecated)	EAK85224	Cmu1	Ustilago maydis	Djamei et al., 2011, Nature, Metabolic priming by a secreted fungal effector	http://www.nature.com/nature/journal/v478/n7369/full/nature10454.html	MKLSVSIFVLLAVSAFGGGSAAAVSGKSEAAEIEAGDRLDALRDQLQRYETPIIQTILARSALGGRAPSEQDEVRAALSRNAFEPSEVISEWLQTESGARFRSTRPLPPAVEFITPVVLSRDTVLDKPVVGKGIFPIGRRPQDPTNMDEFLDTSLLSLNQSSTVDLASAVSLDVSLLHLVSARVLLGYPIALAKFDWLHDNFCHILTNTTLSKSQKLANIIQQLTDHKQEVNVLSRVEQKSKSLSHLFRNDIPYPPHTQDRILRLFQAYLIPITTQIEAAAILDHANKCT
Fungal	apoplastic	G0X7E8	AEK86680, AEK86685, AEK86686, AEK86687, AEK86690, AEK86692, AEK86694, AEK86695	Pep1	Ustilago maydis	Doehlemann et al., 2009, PLoS Pathogens, Pep1, a Secreted Effector Protein of Ustilago maydis, Is Required for Successful Invasion of Plant Cells	http://journals.plos.org/plospathogens/article?id=10.1371/journal.ppat.1000290	MMTTLVQTTLLSLALVLLGSTVPVHADAAGAVPLPNFKVDPQPLASTFYWFSSVEVGVCYNPQARVGSIKGALHCTHQENYDRDNNSYTLPQTCVALKPLGKAFSSNVRDSCTNAKGIFNVIVPASSNALGSQAYDAVQAKGGTGGTGTDDDTSAPDSNDQEKKGGGLLGGIGSMFGM
Fungal	cytoplasmic	G2X4M1	EGY23665	Vdlsc1	Verticillium dahliae	Liu et al.,2014, Nature Communications, Unconventionally secreted effectors of two filamentous pathogens target plant ​salicylate biosynthesis	http://www.nature.com/ncomms/2014/140826/ncomms5686/full/ncomms5686.html	MSSFRSMLGVPPSTASTQDSVLVIIDAQGEYAEGKLKISNIEASRPNISSLLEKYRAANAPIVHVVHETPAGAPLFTQGTKLAEIFDELTPKEGEAVVTKHHPGSFADTNLQEILEKSGKKKIVLVGYMAHVCVSTTARQGAQRGWDVIVAEDAVGDRDIPGVDAAQLVKVALAEIADVFGTLVSSKDIN
Fungal	cytoplasmic	-	KIS66302	Tin2	Ustilago maydis	Tanaka et al., 2015, eLife, A secreted Ustilago maydis effector promotes virulence by targeting anthocyanin biosynthesis in maize	http://elifesciences.org/content/3/e01355#api_box	MNRLQSYTRVFIALVLFSMVCNCFATGGFDYENLASSSSSSGHHDYRLESSPMGRFQTKDYANLLNSRLKDMGWGSEPLAKGLLVPREDLESFVSSVQDVLKTESGQKGLLYLGNTPDSRKVHAVLLKGAQSRSPNIAIISTPKVWRSLNQKIQLHTFAQIDNSNLFDLHQLLQHDFNYSQLDSLARNALPKTPQSEFDNLLPRFPL
Fungal	unknown	Q9C173	AAK31287, AAN39056, AAO49371, AAO73334, AAO73335, AAO73336, AAO73337, AAR29063, AAR29064, AAR29065, AAR29066, AAR29067, AAR29068	ToxB	Pyrenophora tritic-repentis	Martinez et al., 2001, MPMI, Characterization of the ToxB gene from Pyrenophora tritici-repentis	http://apsjournals.apsnet.org/doi/abs/10.1094/MPMI.2001.14.5.675	MAPIFKTTMLLAVAILPAALVSANCVANILNINEAVIATGCVPAGGELRIFVGSSHSYLIKATSSCGLSLTNQVFINGESVQSGGRC
Fungal	unknown	I2FS85	CCF49778	UhAvr1	Ustilago hordei	Laurie et al., 2012 Plant Cell, Genome Comparison of Barley and Maize Smut Fungi Reveals Targeted Loss of RNA Silencing Components and Species-Specific Presence of Transposable Elements	http://www.plantcell.org/content/24/5/1733.full.pdf+html	MRSFSLFLVLCIWVIGVIAPGDKASSSAAPAQQHQPSFKLEIAENPNVDPFLEKISKLGNSHDLYPHVALMRTTLYGKDKLTTNLGAYPDFRRFIYLGNSPGVPEMYFAVPLHLNPHGVDRNLAWSLIYAHSDQPKTLVHHGFVSASGGHLVLDKVKKTNYPSSRSFEIGDVLTLREILDIELPALRFAG
Oomycete	cytoplasmic	Q4VKJ6, M4B6G6	AAX51198	ATR1NdWsB	Hyaloperonospora parasitica, Hyaloperonospora arabidopsidis	Sohn, K. H., Lei, R., Nemri, A., & Jones, J. D. (2007). The downy mildew effector proteins ATR1 and ATR13 promote disease susceptibility in Arabidopsis thaliana. The Plant Cell Online, 19(12), 4077-4090.; Krasileva, K. V., et al. (2010). "Activation of an Arabidopsis Resistance Protein Is Specified by the in Planta Association of Its Leucine-Rich Repeat Domain with the Cognate Oomycete Effector."…	http://www.plantcell.org/content/19/12/4077.full; http://www.plantcell.org/content/22/7/2444.long	MRVCYFVLVPSVALAVIATESSETSGTIVHVFPLRDVADHRNDALINRALRAQTALDDDEERWPFGPSAVEALIETIDRHGRVSLNDEAKMKKVVRTWKKLIERDDLIGEIGKHYFEAPGPLHDTYDEALATRLVTTYSDRGVARAILHTRPSDPLSKKAGQAHRLEEAVASLWKGRGYTSDNVVSSIATGHDVDFFAPTAFTFLVKCVESEDDANNAIFEYFGSNPSRYFSAVLHAMEKPDADSRVLESSKKWMFQCYAQKQFPTPVFERTLAAYQSEDYAIRGARNHYEKLSLSQIEELVEEYSRIYSV
Oomycete	cytoplasmic	Q4VKJ1	AAX51204	ATR1NdWsB	Hyaloperonospora parasitica, Hyaloperonospora arabidopsidis	Sohn, K. H., Lei, R., Nemri, A., & Jones, J. D. (2007). The downy mildew effector proteins ATR1 and ATR13 promote disease susceptibility in Arabidopsis thaliana. The Plant Cell Online, 19(12), 4077-4090.	http://www.plantcell.org/content/19/12/4077.full	MRVCYFVLLPSVALAVIATESSETSRTIVHVFPLRDVADHRNDALINRALRAQAALDDDEERWPFGPSAVKALIRTIDSHRAGLNDEAKMKEVVQTWNKLIERDNLIDEIGKHYSKAPGPVYDSYDEALATMLVTTYSYRGVARAILHPRPSDPISNKAGRAHRLEEAVASLWKERGYTSHNVVSNIATDDDVDFFASTAFTFLVKCVESEDDANNAIFEYFGSNPSRYFSAVLHAMEKPGADIRKLENSKKWMFRLYAQAPEPFSPPDFEWALARFQDEDHAFVGAQNDYKKLSPSQIEKLVEEYSGIYSVTSRNFVGRASE
Oomycete	cytoplasmic	Q4VKJ0	AAX51205	ATR1NdWsB	Hyaloperonospora parasitica, Hyaloperonospora arabidopsidis	Sohn, K. H., Lei, R., Nemri, A., & Jones, J. D. (2007). The downy mildew effector proteins ATR1 and ATR13 promote disease susceptibility in Arabidopsis thaliana. The Plant Cell Online, 19(12), 4077-4090.	http://www.plantcell.org/content/19/12/4077.full	MRVCYFVLLPSVALAVIATESSETSRTIVHVFPLRDVADHRNDALINRALRAQAALDDDEERWPFGPLAVKALIRTIDSHRAGLNDDEAKMKEVVQTWNKLIERDNLIDEIGKHYSKAPGPVYDSYDEALATMLVTTYSYRGVARAILHPRPSDPISNKAGRAHRLEEAVASLWKERGYTSHNVVSNIATDDDVDFFASTAFTFLVKCVESEDDANNAIFEYFGSNPSRYFSAVLHAMEKPGADIRKLENSKKWMFRLYAQAPEPFSPPGFEWALARFQDEDHAFVGAQNDYKKLSPSQIEKLVEEYSGIYSVTSRNFVGRASE
Oomycete	cytoplasmic	Q5G7L3	AAW63763	ATR13	Hyaloperonospora parasitica	Sohn, K. H., Lei, R., Nemri, A., & Jones, J. D. (2007). The downy mildew effector proteins ATR1 and ATR13 promote disease susceptibility in Arabidopsis thaliana. The Plant Cell Online, 19(12), 4077-4090.	http://www.plantcell.org/content/19/12/4077.full	MRLVHAVLLPGIIVFVSNGNLLHAHALHEDETGVTAGRQLRAAASEVFGLSRASFGLGKAQDPLDKFFRKIINSRKPIETSYSAKGIHEKIIKAYDRHVFESKKAHDRHVSKSKKAHGRHVSKSKMAHDRHVSKSEKAPIQYASVMEYLKKTYPGPHIERIVSTLERHDEVGAKDLGAKLRAALDRQ
Oomycete	cytoplasmic	Q5G7K8	AAW63767	ATR13	Hyaloperonospora parasitica	Sohn, K. H., Lei, R., Nemri, A., & Jones, J. D. (2007). The downy mildew effector proteins ATR1 and ATR13 promote disease susceptibility in Arabidopsis thaliana. The Plant Cell Online, 19(12), 4077-4090.	http://www.plantcell.org/content/19/12/4077.full	MRLVHAVLLPGIIVFVSNGNLLHAHALHEDETGVTAGRQLRAAASEVFGLSRASFGLGKAQDPLDKFFSKIIFSGKPIETSYSAKGIHEKIIEAHDLHVSKSKNAPIQYASVMEYLKKTYPGPDIERIVSTLERHDEVGAKDLGAKLRDALDRQ
Oomycete	cytoplasmic	Q5G7L2	AAW63764	ATR13	Hyaloperonospora parasitica	Sohn, K. H., Lei, R., Nemri, A., & Jones, J. D. (2007). The downy mildew effector proteins ATR1 and ATR13 promote disease susceptibility in Arabidopsis thaliana. The Plant Cell Online, 19(12), 4077-4090.	http://www.plantcell.org/content/19/12/4077.full	MRLVHAVLLPGIIVFVSNGNLLHAHALHEDETGVTAGRQLRAAASEVFGLSRASFGLGKAQDPLDKFFRKIINSRKPIETSYSAKGIHEKIIKAYDRHVFESKKAHDRHVSKSKKAHGRHVSKSKMAHDRHVSKSEKAPIQYASVADYLKKIYPGTDIERIVSTLKRHDEVGAKDLGAKLQTAVASQ
Oomycete	cytoplasmic	H9BPR8	AFD62207	ATR39-1	Hyaloperonospora arabidopsidis	Goritschnig, S., Krasileva, K. V., Dahlbeck, D., & Staskawicz, B. J. (2012). Computational prediction and molecular characterization of an oomycete effector and the cognate Arabidopsis resistance gene. PLOS genetics, 8(2), e1002502.	http://journals.plos.org/plosgenetics/article?id=10.1371/journal.pgen.1002502	MVKCTPLLALTVIVSAGSDALSDPTVKRLAKLATINQAPATQSNSDSKRVLRASDVPDEVAAGESRSPKSLWPWEVEDKLAPLKEKLISTSADDLEAGGSANKNALPMIWRWLWQNQIETKKTPIDEISKEVQTAMDLISSQATHEELNKAGVSVSDYVKALRFTLSDIDVVNRGMEYNIHLGNK
Oomycete	unkown	E6YE64	CBI63251	ATR5	Hyaloperonospora arabidopsidis	Bailey, K., Çevik, V., Holton, N., Byrne-Richardson, J., Sohn, K. H., Coates, M., ... & Tör, M. (2011). Molecular cloning of ATR5Emoy2 from Hyaloperonospora arabidopsidis, an avirulence determinant that triggers RPP5-mediated defense in Arabidopsis. Molecular Plant-Microbe Interactions, 24(7), 827-838.	http://apsjournals.apsnet.org/doi/abs/10.1094/MPMI-12-10-0278	MRLISPALVVSTAIQARHVNSSAPVDSAMTEANPLASAHPPDVGYDGVPAGRVRNPDDPTTEERTPGESFMEAINFKIFKLVQEAQGRILGLPEQPRGDMEWLERYGQDAILHYLETGDKDPSQLEKKYDQLLDELKNAPNLEVEILESIHALFLAYMEEVAKPAVQTTPKLNEQPDKFAWAMINKARRNAKPGIRNPYKSLNIPLVENYIKKYNAFIELRQRELTLLDTFSCAFNHNTVKLAKFLAMVDTFSPKRTFVLAMRIELSEIWIEEKRTIAEVASILGISTITGYAKNRLSAGTFVRFIYQLAKTNEQLGPDIVKDLVKTFGPDRTTELLTRMKTVSPRMFTILKDHMDVRLKETGVTPN
Oomycete	cytoplasmic	E0W4Y2, G5A8D2	AEK81007, AEK81008, AEK81009, EGZ08158	Avh241	Phytophthora sojae	Yu, X., Tang, J., Wang, Q., Ye, W., Tao, K., Duan, S., ... & Wang, Y. (2012). The RxLR effector Avh241 from Phytophthora sojae requires plasma membrane localization to induce plant cell death. New Phytologist, 196(1), 247-260.	http://onlinelibrary.wiley.com/doi/10.1111/j.1469-8137.2012.04241.x/full	MRQYCLLLIVLALAAALSDNAVASTLAVARSEIGAPSAVYSERLLRSEPQDEDTFEDRAFGLNWLRLRWLRLGAAKAKTTDVISARESKWIEAWANKNLSPNYVYKQLGLAKQGDKAMQSQNYRIFEAYTERLFAKDQALYTKWLDAKMTPEDVYKALKLDKLLGAKAANSPDFRRYEVYMFKWHELN
Oomycete	cytoplasmic	E0W547, G4ZKT3	AEK80452, AEK80453, AEK80454, EGZ14529	Avh5	Phytophthora sojae	Sun, F., Kale, S. D., Azurmendi, H. F., Li, D., Tyler, B. M., & Capelluto, D. G. (2013). Structural basis for interactions of the Phytophthora sojae RxLR effector Avh5 with phosphatidylinositol 3-phosphate and for host cell entry. Molecular Plant-Microbe Interactions, 26(3), 330-344.	http://apsjournals.apsnet.org/doi/abs/10.1094/MPMI-07-12-0184-R	MRLQFFLVMAVATLATISATRVPDDANLQSVNAPVQTVTRSRRFLRTADTDIVYEPKVHNPGKKQVFIEDKLQKALTDPKKNKKLYARWYNSGFTVKQVEGGLDQNENRELELTYKNLALGYAKYYQARRSQEAK
Oomycete	cytoplasmic	A4L9T6, G4ZYS8	ABO47652, EGZ12111	Avr1a/Avh275	Phytophthora sojae	Qtob et al., 2009., PloSOne, Polymorphisms of Copy Number Variation and transcriptional Polymorphisms of Phytophthora sojae RXLR Effector genes Avr1a and Avr3a	http://journals.plos.org/plosone/article?id=10.1371/journal.pone.0005066	MRLTNTLVVAVAAILLASENAFSAATDADQATVSKLAAAEFDTLVDVLTTESKRSLRATVDDGEERYKQFKIEALKKGKWTDIFNKWKGNELSPAEVQNKLKNKKLSDDLKDAIFRNYKDW
Oomycete	cytoplasmic	Q8L552, G4ZRQ8	AAM20934, AAM20937, EGZ13867	AVR1B-1	Phytophthora sojae	Shan, W., Cao, M., Leung, D., & Tyler, B. M. (2004). The Avr1b locus of Phytophthora sojae encodes an elicitor and a regulator required for avirulence on soybean plants carrying resistance gene Rps 1b. Molecular Plant-Microbe Interactions, 17(4), 394-403.	http://apsjournals.apsnet.org/doi/abs/10.1094/MPMI.2004.17.4.394	MRLSFVLSLVVAIGYVVTCNATEYSDETNIAMVESPDLVRRSLRNGDIAGGRFLRAHEEDDAGERTFSVTDLWNKVAAKKLAKAMLADPSKEQKAYEKWAKKGYSLDKIKNWLAIADPKQKGKYDRIYNGYTFHLYQS
Oomycete	cytoplasmic	G4ZLE6, L7WWG5	EGZ16228, AGC92778	Avr1d/Avh1b-6	Phytophthora sojae	Yin, W., Dong, S., Zhai, L., Lin, Y., Zheng, X., & Wang, Y. (2013). The Phytophthora sojae Avr1d gene encodes an RxLR-dEER effector with presence and absence polymorphisms among pathogen strains. Molecular Plant-Microbe Interactions, 26(8), 958-968.	http://apsjournals.apsnet.org/doi/abs/10.1094/MPMI-02-13-0035-R	MRLSSTTFVVLAAVLLASGTAVSKADETGVTNVNAVHSPNVLAGVDKRFLRSHHTEDGEAKLSNYDNEERNGLFGANTLSNMGKDTILRFQMFTKWKANGYLPKKIKDDIPRSLYKAYKIHYRMN
Oomycete	cytoplasmic	B2C6F5, G4ZRQ7	ABZ10806, EGZ13866, AGC95071, AGC95072, AGC95073	Avr1k/Avh331	Phytophthora sojae	Kale, S. D., Gu, B., Capelluto, D. G., Dou, D., Feldman, E., Rumore, A., ... & Tyler, B. M. (2010). External lipid PI3P mediates entry of eukaryotic pathogen effectors into plant and animal host cells. Cell, 142(2), 284-295.	http://www.sciencedirect.com/science/article/pii/S0092867410006628	MMQWSAILIRTCFSGSGGEALTCATSEQQTRPELCFFFSVRSSWPSTISDGACLALVSAEQGATAGRNTLSLRSMMATEDMATSTRSLRSQATNVDDDANVSIENRGMNPSVLTKLGEFASTLTAGNTANKLWLMADVDPKSAFKLLGLDMPGVRFIDNPKMLQWLKFTKAYLDMKKSGFGETSAHALLYEKIGGPDLSLLLLSLKDAPDANSLVQKLTNSQFGMWHDARIEPEQLAQTVFKIQDVRKLPKNDPKLQVIDDYAKYHRKHRKFLNSIMII
Oomycete	cytoplasmic	D0NN59	EEY61966, EEY61978	Avr2	Phytophthora infestans	Saunders, D. G., Breen, S., Win, J., Schornack, S., Hein, I., Bozkurt, T. O., ... & Kamoun, S. (2012). Host protein BSL1 associates with Phytophthora infestans RXLR effector AVR2 and the Solanum demissum immune receptor R2 to mediate disease resistance. The Plant Cell Online, 24(8), 3420-3434.	http://www.plantcell.org/content/24/8/3420.short	MRLTCILAVLVAVTFHATGNANSAVAGKASNENGVDMITTTDVHDPRLLRRVGNDEGEIVEERAKGFKEKLKAVVEKITPKKSLEKLKETVISTPDWAKIVKHKTDEAMRLGYK
Oomycete	cytoplasmic	D0NPN8, Q572D3	EEY62600, ADC96691, AEH27535	Avr3A	Phytophthora infestans	Bos, J. I., Armstrong, M. R., Gilroy, E. M., Boevink, P. C., Hein, I., Taylor, R. M., ... & Birch, P. R. (2010). Phytophthora infestans effector AVR3a is essential for virulence and manipulates plant immunity by stabilizing host E3 ligase CMPG1.Proceedings of the National Academy of Sciences, 107(21), 9909-9914.	http://www.pnas.org/content/107/21/9909.short	MRLAIMLSATAVAINFATSSAIDQTKVLVYGTPAHYIHDSAGRRLLRKNEENEETSEERAPNFNLANLNEEMFNVAALTERADAKKLAKQLMGNDKLADAAYMWWQHNRVTLDQIDTFLKLASRKTQGAKYNQIYNSYMMHLGLTGY
Oomycete	cytoplasmic	F8UNP0	AEI75280	Avr3b	Phytophthora sojae	Dong, S., Yin, W., Kong, G., Yang, X., Qutob, D., Chen, Q., ... & Wang, Y. (2011). Phytophthora sojae avirulence effector Avr3b is a secreted NADH and ADP-ribose pyrophosphorylase that modulates plant immunity. PLoS pathogens, 7(11), e1002353.	http://journals.plos.org/plospathogens/article?id=10.1371/journal.ppat.1002353#ppat-1002353-g007	MRFLFLLVAVALASAEAAESAAMIHEEAGVSSFKTLTGVNQIQRSLRVLLGADEERGVGGVSLKNILAPFKQTFQHPIAITAAALRELNDFKSLVNTVMKHYPKGLSEKAVQELRTAEEKRLTDYVFLGASDKNKLLREMDGVDEAKIASNLKSLTGRENQVLGEAGGRSVVCNVVMRPEAEGGGILLISSSKLDKLDFILPKGGLEKGEIAYKAAKREVLEEGGVR
Oomycete	cytoplasmic	Q01918, D0P3S7	AAA21422, AAY43376, EEY61733, AGV54937, 2006269D	Avrblb1/ipiO1	Phytophthora infestans	Chen, Y., et al. (2012). "Molecular Determinants of Resistance Activation and Suppression by Phytophthora infestans Effector IPI-O." PLoS Pathog 8(3): e1002595.	http://journals.plos.org/plospathogens/article?id=10.1371/journal.ppat.1002595	MRSLLLTVLLNLVVLLATTGAVSSNLNTAVNYASTSKIRFLSTEYNADEKRSLRGDYNNEVTKEPNTSDEERAFSISKSAEYVKMVLYGFKLGFSPRTQSKTVLRYEDKLFTALYKSGETPRSLRTKHLDKASASVFFNRFKKWYDKNVGPS
Oomycete	cytoplasmic	D0P1B2	EEY54138	Avrblb2	Phytophthora infestans	Bozkurt, T. O., Schornack, S., Win, J., Shindo, T., Ilyas, M., Oliva, R., ... & Kamoun, S. (2011). Phytophthora infestans effector AVRblb2 prevents secretion of a plant immune protease at the haustorial interface. Proceedings of the National Academy of Sciences, 108(51), 20832-20837.	http://www.pnas.org/content/108/51/20832.short	MRSILYAVLAFAVLARSSAVAAFPIPDESRPLSKTSPDTGATRSLRVEAQEVIQSGRGDGYGGFWKNVFPSTNKIIKKPDIKISKLIAAAKKAKAKMTKS
Oomycete	apoplastic	W2Q1I5, O42830_PHYPR	ETN07058	CBEL	Phytophthora parasitica	Mateos, F. V., et al. (1997). "Cloning and Characterization of a cDNA Encoding an Elicitor of Phytophthora parasitica var. nicotianae That Shows Cellulose-Binding and Lectin-Like Activities." Molecular Plant-Microbe Interactions 10(9): 1045-1053.	http://apsjournals.apsnet.org/doi/abs/10.1094/MPMI.1997.10.9.1045	MIARITVVFAGLVAVVSGACSTPSFGNCGSDAAGVSCCQSTQYCQPWNANYYQCLDLPAKCAQQFPNVDFNGDDIQTIYGIQPGECCTRCSETAGCKAYTFVNSNPGQPACYLKSGTGTRTPSVGAVSGILTGTSTTPTPTPTMTPTPTPTTSSPTCTTAPYGSCGSSNGATCCPSGYYCQPWNDSFYQCIQPPAKCSKQLTDKDYYGNDIKTVYVSLPSLCCDACASTAGCKAYTYINNNPGQPVCYLKSAAGTATTKIGAVSGTLN
Oomycete	cytoplasmic	Q8H6Z6	AAN31500	crn1	Phytophthora infestans	Torto, T. A., et al. (2003). "EST Mining and Functional Expression Assays Identify Extracellular Effector Proteins From the Plant Pathogen Phytophthora." Genome Research 13(7): 1675-1685.	http://genome.cshlp.org/content/13/7/1675.full.pdf+html	MVTLYCVVVGVAGSAFPVDIDENKSVGHLKDAIKEKNASTITCDAKNLQLFLAKKKKGAGVRLTENDVKDGVSDTSDLKLLGVAGAPLSLVGLSEKDVKFVPTLEDVESMNTPVHVLVVVPEQDGTISKEMSAATSPLTVEQVEMSMNKVLRERDEKASAYSFSDLNTAMEERIVKKMRLTENIPDVKEPVDTSIAGYSWIPKIVESEESQRAGYMEYLQQHLKTLIDRGDFLLDDIAGDKSVLNIVDPRLPFAMKGTADVLLINRTAKNPLIKLAGVSLVIELKKKVEPGHVPQAIGQLVSCSMKAPLNCYPLSLLTDLNDHWHFSWFSDKHVLTQVTLKYPKNAFRFIEAAVLGRTDSAPPPPSFMPGSFKTIKVDDFLPQPVDARAEEMMERYELM…
Oomycete	cytoplasmic	E9M7A1	ADU87014	CRN115	Phytophthora sojae	Liu, T., et al. (2011). "Two Host Cytoplasmic Effectors Are Required for Pathogenesis of Phytophthora sojae by Suppression of Host Defenses." Plant Physiology 155(1): 490-501.	http://www.plantphysiol.org/content/155/1/490	MVKLFCAIVGVAGSAFPVDIDGGQSVGDLKKAIKAESEDITIPAKDLKLFLAKTEGGAWLPDDDQAALDLEDGKVHEDIQALIDGEKMKATWTIEDVLTANNMTKRKGRAPKSRQIHVLVVVPEGAFGSASETSKMDQLVEKVDKMYEQTVLGKRKYVHSEVTSTQGRQLLNDLDIRVEFVRTVPFDAGEGSSVDPYEWKRVIIENGEEVVLTEEQQRKRYRRYVEHNIGTVLKETQLCVIGVERGTNILTVKVPGREIELAGRTDLLILSDLVAMRPTEVQYLPGVKMLIEVKRDVKASNDFQALSELIALDLLVDDPVMALLTDLEGEWIFFWVAEKINSSARIHKAAINKPGEAFEVIRALLVQPPTAPADTDTTEIKLPYFQSPVKRLKLRKALP…
Oomycete	cytoplasmic	Q8H6Z4	AAN31502	crn2	Phytophthora infestans	Torto, T. A., et al. (2003). "EST Mining and Functional Expression Assays Identify Extracellular Effector Proteins From the Plant Pathogen Phytophthora." Genome Research 13(7): 1675-1685.	http://genome.cshlp.org/content/13/7/1675.full.pdf+html	MVKLVCAIVGVAGSAFPVDTDASQLVGDLKKAIKAENAMTFTGDAKDLQLFLAKQPVDDESGKEVVPVYRPSAEEMKEESFKWLPDEHRAALKLVEGESDDYIHALTAGEPILGSKTLTTWFYTKNNMELPSSEQIHVLVVVPDGAGGSASDTSRMDRLFDKVDKVYEHTVLSKRTRYVHSEMNSAKGNILLNDLKIRISPVDTVKFAGGVPTPAKEFKWKSDRTEEQQKEPYREYVVANIGDVLTNNKLCVVGVEKGVNILTVEVPGRDIVLAGRTDMIVLSDIAQKFPHYLPHLPGVRMLIEVKKVVTTASEFQALSELIALDIIATESVMALLTNLTNHWQFFWVSRKSDDRVIIETTTLIAPGEAFAVIRTLLDQSPSAGAEVSLPCFEKPVKRQ…
Oomycete	cytoplasmic	E9M7A0, G4YRT1	ADU87013, EGZ22908	CRN63	Phytophthora sojae	Liu, T., et al. (2011). "Two Host Cytoplasmic Effectors Are Required for Pathogenesis of Phytophthora sojae by Suppression of Host Defenses." Plant Physiology 155(1): 490-501.	http://www.plantphysiol.org/content/155/1/490	MVKLFCAIVGAAGSAFPVDIDAGQSAGDLKDAIKAKNPATITCDAKDLQLSLAKTADGAWLPDDDQAALDLEDGKVHEDIQALIDGEKMKATWTIEDVLTANNMTKRKGRAPKSRQIHVLVVVPEGAFGSASETSKMDQLVEKVDKMYEQTVLGKRKYVHSEVTSTQGRQLLNDLDIRVEFVRTVPFDAGEGSSVDPYEWKRVIIENGEEVVLTEEQQRKRYRRYVEHNIGAVLKEKQLCVIGVERGTNILTVKVPGREIELAGRTDLLILSDLVAMRPTEVQYLPGVKMLIEVKRDVKASNDFQALSELIALDLLVDDPVMALLTDLKGEWIFFWVAEKINSSARIHKAAINKPGEAFEVIRALLVQPPTAPADTDTTEIKLPCFQSPVKRLKLRKAL…
Oomycete	cytoplasmic	Q2M405	AAY43402	CRN8	Phytophthora infestans	Schornack, S., et al. (2010). "Ancient class of translocated oomycete effectors targets the host nucleus." Proceedings of the National Academy of Sciences 107(40): 17421-17426.	http://www.pnas.org/content/107/40/17421.short	MVTLFCAVVGVAGSTFPVDINENKSVGHLKKAIKEEKMYQFPADELQLFLAKAGGNAWLSSLTEDVKKLKKGEKTALVKSLTQEEKELQGEDPISECLEGMDPPKVKQIHVLVALPPGTSSAPISDGTDLWLSRFQHSEVAKLTLLPTRGDLNEFIGQPLPVKIGLPQSVFQAWSSPLILGQLLRDKLFELNDISPCEFLKDSVFSAAFLYPQVDGDATESAFHYFWDSIIRVVLGFVFRRAYVNRDSSRKSSSGLKRPDFLFALDHICVFRGEEKEPRTSITVPREELSKKLVWSYGGVPYVFGYAASGFELELFAIYQDVTGNVKTHLIGGFNLQHAPERFRLVLALLNLCLLFPAIVQNCPASAGTEFMDIHRANGVKVRLSPIFVDKIFHTQEEY…
Oomycete	cytoplasmic	Q2M3Z8_PHYIN	AAY43409	CRN15	Phytophthora infestans	Schornack, S., et al. (2010). "Ancient class of translocated oomycete effectors targets the host nucleus." Proceedings of the National Academy of Sciences 107(40): 17421-17426.	http://www.pnas.org/content/107/40/17421.short	MVKLVCAIVGVAGSAFPVDIDASQLVGDLKKAIKAENAMTFTGDAKDLQLFLAKQPVDDESGKEVVPVYRPSAEEMKEESFKWLPDEHRAALKLVEGESDDYIHALTAGEPILGSKTLTTWFYTKNNMELPSSEQIHVLVVVPEQGSSVPTVSQDGVFDHCINPFFLQFRTVDKVGDWLEFSSLLPLTRRQKLYIRSSYQVIANHALFNPNVGMVKYAVVTGTPGVGKSVFVYYVLWRLIKEKKRVLLFDNNGLFYFDGSTMLICLALPSKFNEQFWSPDLWCLVDSMDPTSIPGLPYRLCSVLLASTPRRDCIGEFKKQPPTADVFYMPLWSKEELATIAPMYPHAAAVWENRFDCLGGVPRLVLQDIETDPQALLMSACSSCSLDDCIMLVSIYSEI…
Oomycete	cytoplasmic	Q2M3Z7_PHYIN	AAY43410	CRN16	Phytophthora infestans	Schornack, S., et al. (2010). "Ancient class of translocated oomycete effectors targets the host nucleus." Proceedings of the National Academy of Sciences 107(40): 17421-17426.	http://www.pnas.org/content/107/40/17421.short	MVVVSLQCAIVGQAGSSFDVEIDDGAKVSKLKDAIKAKKPNDFKVVDADKLHLFLAKQPVEDESGKEVVPVYRPSAEEMKEENLKWLPDEHRAALKLVEGESDDYIHALTAGEPILGSKTLTTWFYTKNNMELPSSEQIHVLVVVPEQGFSVPTVSQDGVFDHCINPFFLQFRTVDKVGDWLEFSSLLPLTRRQKLYIRSSYQVIANHALFNPNVGMVKYAVVTGTPGVGKSVFVYYVLWRLIKEKKRVLLFDNNGLFYFDGSTMLICLALPSKFNEQFWSPDLWCLVDSMDPTSIPGLPYRLCSVLLASTPRRDCIGEFKKQPPTADVFYMPLWSKEELATIAPMYPHAAAVWENRFDCLGGVPRLVLQDIGTNPQALLMSACSSCSLDDCIVLASIH…
Oomycete	apoplastic	Q6PQH2, D0MVC9	AAT00500, EEY61125	EPI1	Phytophthora infestans	Tian, M., et al. (2004). "A Kazal-like Extracellular Serine Protease Inhibitor from Phytophthora infestans Targets the Tomato Pathogenesis-related Protease P69B." Journal of Biological Chemistry 279(25): 26370-26377.	http://www.jbc.org/content/279/25/26370	MKSALLFTLVVAAVHAQSPQVISPAPRRESNEIDCPEYCLDVYDPVGDGEGNTYSNECYMKRAKCHNETTPPAWKDLVLITGSSTGEQPPSKKCSTVCPDVELPVCGSNRVRYGNPCELRIAACEHPELNIVEDSGKACVGSKVTPQEG
Oomycete	apoplastic	Q6PQH1, D0MVC6	AAT00501, EEY61122	EPI2	Phytophthora infestans	Tian, M., et al. (2004). "A Kazal-like Extracellular Serine Protease Inhibitor from Phytophthora infestans Targets the Tomato Pathogenesis-related Protease P69B." Journal of Biological Chemistry 279(25): 26370-26377.	http://www.jbc.org/content/279/25/26370	MKSAVIFTLLAAMATVNALVTHDLRPISIGSEEKDCPKYCLDIDDPVGDEEGNMYSNECYMKRAKCAKNKPTDPPFWKNFKFSNDGSTTQETPKRKCSSGCPDVELPVCGSDGVRYGNPCELKIAACEHPELNIVEAVGMGCRKSRVQLH
Oomycete	apoplastic	A1L015, D0NBV1	AAY21181, EEY55256	EpiC1	Phytophthora infestans	Tian, M., et al. (2007). "A Phytophthora infestans Cystatin-Like Protein Targets a Novel Tomato Papain-Like Apoplastic Protease." Plant Physiology 143(1): 364-377.	http://www.plantphysiol.org/content/143/1/364	MTFLRPILALLAATALVTTSAQVDGGYSKKEVTPEDMELLQKAQSNVSAYNSDVTSRICYLKVDSLETQVVSGENYKFHVSGCSVNSDNELGGCANQNCESSKYDIVIYSQSWTNTLEVTSITPVK
Oomycete	apoplastic	A1L016, D0NBV4	AAY21182, EEY55259	EPIC2A	Phytophthora infestans	Tian, M., et al. (2007). "A Phytophthora infestans Cystatin-Like Protein Targets a Novel Tomato Papain-Like Apoplastic Protease." Plant Physiology 143(1): 364-377.	http://www.plantphysiol.org/content/143/1/364	MSFLRPTLALLAVTALVTTSAQMNGYTKKEVTPEDMELLQKAQSNVSAYNRDVTSRICYLKVDSLETQVVSGESYKFHVSGCGVNSDKELGGCANQNCESSKYDIVIYSQSWTNTLEVTSITPAN
Oomycete	apoplastic	D0NBV3	EEY55258	EpiC2B	Phytophthora infestans	Song, J., et al. (2009). "Apoplastic effectors secreted by two unrelated eukaryotic plant pathogens target the tomato defense protease Rcr3." Proceedings of the National Academy of Sciences 106(5): 1654-1659.	http://www.pnas.org/content/106/5/1654	MSFLRPTLALLAVTALVTTSAQLNGYSKKEVTPEDTELLQKAQSNVSAYNSDVTSRICYLKVDSLETQVVSGENYKFHVSGCSVNSDKELGGCANQNCESSKYDIVIYSQSWTNTLKVTSITPAN
Oomycete	apoplastic	Q945U0, G5AED4	AAL11720, EGZ06534, EGZ06536, EGZ06539	GIP1	Phytophthora sojae	Rose, J. K. C., et al. (2002). "Molecular Cloning and Characterization of Glucanase Inhibitor Proteins: Coevolution of a Counterdefense Mechanism by Plant Pathogens." The Plant Cell 14(6): 1329-1345.	http://www.plantcell.org/content/14/6/1329	MKVFPALTSALVALGTAGVEAEHVQRSLVMGGGTVPVGAKTYTVGLRTTAEGDTFCGGALISPTHVLTTATCTASLGSGPAEWAAVGTHYLNGAKDGERLKVVSAQNHTLYNPNNFAYNFAVLTLEKPSKFSPVKLPAADGSDIAPSMSSKLMGWGDTSYPNGARANELQSVELRVVTSNCTYTVGPSEVCAGGEEGKDKCAGDTGGPLIKENGSGDADDILIGLASWGMPCGHKDVASVYARVSAGLEWINSVIKK
Oomycete	apoplastic	Q945T9, G5AE36	AAL11721, EGZ06438, EGZ06443	GIP2	Phytophthora sojae	Rose, J. K. C., et al. (2002). "Molecular Cloning and Characterization of Glucanase Inhibitor Proteins: Coevolution of a Counterdefense Mechanism by Plant Pathogens." The Plant Cell 14(6): 1329-1345.	http://www.plantcell.org/content/14/6/1329	MKVTATIAAASMAIAAASADADTTSRQLILGGSIIPSGQKTYSVGIRSTAGGDTYCGGALISPTHVLTTTMCTKHAKPDFVAVGTHYVNGTKDGEQLKVIQAQNHTDFNKTGNGEYDFALLTLEKPSKFAPVKLPKADDSDIKPGMWSKAMGWGWTSFPNGSPSNEMQGVNLQVWSNEDCSQVYVINPTNVCAGGVAGKDACVADTGGPLIKENGAGDKDDVLIGLVNWGYGCGDEGAPTVYSRVSSALKWVNPIIKTKQVKTAVPVQQAISGKHGVPIKQGMPGTVRN
Oomycete	apoplastic	Q01905, D0NKT5	AAB49807, AAV92913, AAV92919, EEY60221	INF1	Phytophthora infestans	Kamoun, S., et al. (1997). "A Gene Encoding a Protein Elicitor of Phytophthora infestans Is Down-Regulated During Infection of Potato." Molecular Plant-Microbe Interactions 10(1): 13-20.	http://apsjournals.apsnet.org/doi/abs/10.1094/MPMI.1997.10.1.13	MNFRALFAATVAALVGSTSATTCTTSQQTVAYVALVSILSDTSFNQCSTDSGYSMLTATSLPTTEQYKLMCASTACKTMINKIVSLNAPDCELTVPTSGLVLNVYSYANGFSSTCASL
Oomycete	unknown	O42718	AAB94814, AAU10320	INF2A	Phytophthora infestans	Huitema, E., et al. (2005). "Differences in Intensity and Specificity of Hypersensitive Response Induction in Nicotiana spp. by INF1, INF2A, and INF2B of Phytophthora infestans." Molecular Plant-Microbe Interactions 18(3): 183-193.	http://apsjournals.apsnet.org/doi/abs/10.1094/MPMI-18-0183	MNTKTFLAIAAAAFVGFAAAETCSPTDQTTAYSTLASVLTLSSFQGCADDSGFSLLYSTALPDDDQYVKMCASDNCKSLIESVASLNPPNCDLTVPTSGLVLNVVDLTSGFSEKCSSSSSTSNTASSAATSTTTEAPAATTAAPTTDTTTASTATDAPAATPVATPATTTTNSTESVTQTSAAAC
Oomycete	unknown	O42719	AAB94815	INF2B	Phytophthora infestans	Huitema, E., et al. (2005). "Differences in Intensity and Specificity of Hypersensitive Response Induction in Nicotiana spp. by INF1, INF2A, and INF2B of Phytophthora infestans." Molecular Plant-Microbe Interactions 18(3): 183-193.	http://apsjournals.apsnet.org/doi/abs/10.1094/MPMI-18-0183	MNTKTFLAISAAAVVGFAAAETCSPTDQTTAYSTLASVLTLSSFQGCADDSGFSLLYSTALPDDAQYVKMCASDNCKSLIESVAGLNPPNCDLTVPTSGLVLNVVDLTSGFSKKCSSSSSTSNTASSAATSRTTEAPAATTAAPTTDSTATDAPAATPAVTPVATPAATSTNSTESVTQTSVTQTTAAC
Oomycete	apoplastic	Q9AT28, W2YSU5	AAK19753, ETP37239	NPP1	Phytophthora parasitica	Fellbrich, G., A. Romanski, A. Varet, B. Blume, F. Brunner, S. Engelhardt, G. Felix, B. Kemmerling, M. Krzymowska and T. Nürnberger (2002). "NPP1, a Phytophthora-associated trigger of plant defense in parsley and Arabidopsis." The Plant Journal 32(3): 375-390.	http://onlinelibrary.wiley.com/doi/10.1046/j.1365-313X.2002.01454.x/abstract	MNVLTFLIAAAVSLAVVQADVISHDAVVPFAQPTATTTEQKAGVKFKPQIHISNGCHPYPAVDANGNTSGGLKPTGSSSAGCKGSGYGSQVYGRVATYNGVYAIMYSWYFPKDSPVTGLGHRHDWEHVVVWVDDIKLDSPSIIAVSPSAHSGYNIYYPPESNTIDGYSAKVDYSSSWVVINHALDSTTDAGETQDLIMWDQLTDAARTALENTDFGDANVPMKDGNFLTKVGNAYYA
Oomycete	apoplastic	Q94FS7	AAK63068	PcF	Phytophthora cactorum	Orsomando, G., M. Lorenzi, N. Raffaelli, M. Dalla Rizza, B. Mezzetti and S. Ruggieri (2001). "Phytotoxic Protein PcF, Purification, Characterization, and cDNA Sequencing of a Novel Hydroxyproline-containing Factor Secreted by the Strawberry Pathogen Phytophthora cactorum." Journal of Biological Chemistry 276(24): 21578-21584.	http://www.jbc.org/content/276/24/21578.full.pdf+html	MNFKTCPAVALVAVVATVATAEDPLYCQAIGCPTLYSEANLAVSKECRDQGKLGDDFHRCCEEQCGSTTPASA
Oomycete	cytoplasmic	G3KFL3	AEO72328	PexRD2	Phytophthora mirabilis	Oh, S.-K., C. Young, M. Lee, R. Oliva, T. O. Bozkurt, L. M. Cano, J. Win, J. I. B. Bos, H.-Y. Liu, M. van Damme, W. Morgan, D. Choi, E. A. G. Van der Vossen, V. G. A. A. Vleeshouwers and S. Kamoun (2009). "In Planta Expression Screens of Phytophthora infestans RXLR Effectors Reveal Diverse Phenotypes, Including Activation of the Solanum bulbocastanum Disease Resistance Protein Rpi-blb2." The Plan…	http://www.plantcell.org/content/21/9/2928.abstract?ijkey=80f4373a6276df2a6a9aa28cf4304d8fe98bd472&keytype2=tf_ipsecsha	MRLSYVFVVFAASLLVTADTLSTNTGVQAANLVGPAQRLLRKHYTAAENDGDSEARALNPEKMKTMWKAGMTVDGYAAKLKLTDKIAAAANSAKAMEKLGETHKMKKLLRYLNYVAEHTAV
Oomycete	cytoplasmic	D0MZL5	EEY65678	PITG_03192	Phytophthora infestans	McLellan, H., P. C. Boevink, M. R. Armstrong, L. Pritchard, S. Gomez, J. Morales, S. C. Whisson, J. L. Beynon and P. R. J. Birch (2013). "An RxLR Effector from Phytophthora infestans Prevents Re-localisation of Two Plant NAC Transcription Factors from the Endoplasmic Reticulum to the Nucleus." PLoS Pathog 9(10): e1003670.	http://journals.plos.org/plospathogens/article?id=10.1371/journal.ppat.1003670	MRVGFVFALLVVSVIVCFNGLTSAESTVVMNNRNPDSINVPISDDITSRNLRASGEERAYAFVDKIKSLFSRPGISQKVESLQKNPAMVKNLEKAALSQKGSSKVRDWFMHMYNNSSKRDKFFILATLVMFPIGVWAVVTNYRR
Oomycete	cytoplasmic	D0NVB5	EEY66592	Avr1/PITG_16663	Phytophthora infestans	Du, Y., et al. (2015). "Immune activation mediated by the late blight resistance protein R1 requires nuclear localization of R1 and the effector AVR1." New Phytologist: n/a-n/a.	http://onlinelibrary.wiley.com/doi/10.1111/nph.13355/abstract	MGLMHRVLLLATFALLCMHAKAAGFDHDKVPRTVERGGGARQLRTATMSDDEARVSKLPSFIESFVKNRKIESWIQNKVTDDFVLSELKLVRLPGTSLADDPNFKLFQKFKIGGWLEEKATTTKAWENLGLDSLPFDQVSKIDEFKTYTQYVTVLNKKASKLDIDQWHGLLSGGSPEELMAKAMILRTLGRDVLERRVMLGGHVVVPF
Oomycete	cytoplasmic	G4YEI5	EGZ27262	Pslsc1	Phytophthora sojae	Liu, T., T. Song, X. Zhang, H. Yuan, L. Su, W. Li, J. Xu, S. Liu, L. Chen, T. Chen, M. Zhang, L. Gu, B. Zhang and D. Dou (2014). "Unconventionally secreted effectors of two filamentous pathogens target plant salicylate biosynthesis." Nat Commun 5.	http://www.nature.com/ncomms/2014/140826/ncomms5686/full/ncomms5686.html	MAALSSATKRLGRLIPHSSVLFVCDVQEVFRGLTFQLPTVIHGTNTMVSAAKLLNVPVVVTTQYGSRLGSTVSEISKNLEDAPDVKVFDKMKFSMLVPEVERHLTTNMPQRKSVLLCGIETHVCVLQTCLDLLDKGYDVHVVSDAVSSSTSYNRSMALERIRQSGAYITSVESAIFQLANDAGNPEFKSISKLIKEHLKVQNGFDTGARI
Oomycete	cytoplasmic	Q9AXL8	AAK01636, AAM48170, EGZ16428	PsojNIP	Phytophthora sojae	Qtob et al., 2002, The Plant Journal, Expression of a Phytophthora sojae necrosis-inducing protein occurs during transition from biotrophy to necrotrophy,	http://onlinelibrary.wiley.com/doi/10.1046/j.1365-313X.2002.01439.x/abstract;jsessionid=4C372A9B7EEFA9ED425CA34064FE9A44.f04t03	MNLRPALLATLASFAYVSASVINHDQVVPFTQPTPTTALQQAAVKYKPQIHISNGCHPYPAVDNNGNTSGGLNPTGSESAGCKGSGYGTQIYGRAVKYQGVYAFMYSWYMPKDETLTGLGHRHDWEACVVWVDDIAASSPKIVALSASAHSGYNKYYPPSSSYFSGNSAKIDYSSSYVVINHALSATSTAGETQPLIMWDQLTDAARRALEDTDFGDANVPFKDANFQTKLGNAYYA
Oomycete	cytoplasmic	A5YTY8_PHYSO	ABQ81647	AVR3a/Avh92/Avr5	Phytophthora sojae	Qtob et al., 2009., PloSOne, Polymorphisms of Copy Number Variation and transcriptional Polymorphisms of Phytophthora sojae RXLR Effector genes Avr1a and Avr3a	http://journals.plos.org/plosone/article?id=10.1371/journal.pone.0005066	MRLAQVVVVIAASFLVATDALSTTNANQAKIIKGTSPGGHSPRLLRAYQPDDEGDSPEDRTLSKAQVTKILNKLGKDVTWDHVMRNPALFQRYQKKANKIIEKQKAAAKNA
Oomycete	cytoplasmic	D0NDJ8_PHYIT	EEY56155, EEY56156	PiAvr2	Phytophthora infestans	Saunders, D. G. O., et al. (2012). "Host Protein BSL1 Associates with Phytophthora infestans RXLR Effector AVR2 and the Solanum demissum Immune Receptor R2 to Mediate Disease Resistance." The Plant Cell 24(8): 3420-3434.	http://www.plantcell.org/content/24/8/3420.long	MRLAYIFAVMMAGALPYCNALHAAPGAKALNKIKTFPDFAAPSPKDGNRLLRRVDNGEFEIEEERGFSLKDTLKKLNPIKAAVKAKDKAKEVTEKITDADWKKLVEHLKIKGDKRS
Oomycete	cytoplasmic	D0NXM3_PHYIT	EEY67823	PiAvr3b	Phytophthora infestans	Dong, S., Yin, W., Kong, G., Yang, X., Qutob, D., Chen, Q., ... & Wang, Y. (2011). Phytophthora sojae avirulence effector Avr3b is a secreted NADH and ADP-ribose pyrophosphorylase that modulates plant immunity. PLoS pathogens, 7(11), e1002353., Martin, M. D., et al. (2013). "Reconstructing genome evolution in historic samples of the Irish potato famine pathogen." Nat Commun 4.	http://journals.plos.org/plospathogens/article?id=10.1371/journal.ppat.1002353#ppat-1002353-g007, http://www.nature.com/ncomms/2013/130718/ncomms3172/full/ncomms3172.html	MRAYFVLLVAATAILTYGGATATYSTSKGEMNLTGTVENNRPTRSLRVAPSGGNGEERSWSTIYGISRSKAETVRDWLMPRLNQGMDVQALAREMGITSRQAATQHQNWDALVKYLKMYNYAVRGEKMSKSMAESVLLHNVLTAKNNF
Oomycete	cytoplasmic	D0N8A3_PHYIT	EEY53788	PiAvr4	Phytophthora infestans	van Poppel, P. M. J. A., et al. (2008). "The Phytophthora infestans Avirulence Gene Avr4 Encodes an RXLR-dEER Effector." Molecular Plant-Microbe Interactions 21(11): 1460-1470.	http://apsjournals.apsnet.org/doi/abs/10.1094/MPMI-21-11-1460	MRSLHILLVFTASLLASLTESAKADSLARTVSVVDNVKVKSRFLRAQTDEKNEERATITLGDRVVSDKAATKDLLQQLLALGTPLEKVQKQFLNIPQMKTFAELSKHPNWKALDKYERMQWQKLKEGETLTFMRLGDRLYSKEKAQEQLLRWVAQKKPVESVYDDLQVAGFAHNTVAARQNWRAYIMYDKWFTAASQMQRNPQQYAKFGTGYHSEQKTTELFEKWAMEGTHIKSVITTLKLNGKSASEMANNENFPALLKYVKLYLDFKPVRDLNAKSRLQARRPIS
Oomycete	cytoplasmic	D0NTY1_PHYIT	EEY56105	PiAvrVnt1	Phytophthora infestans	Pel MA. 2010. Mapping, isolation and characterization of genes responsible for late blight resistance in potato, Wageningen Univ. , Cooke, D. E. L., et al. (2012). "Genome Analyses of an Aggressive and Invasive Lineage of the Irish Potato Famine Pathogen." PLoS Pathog 8(10): e1002940.	-, http://journals.plos.org/plospathogens/article?id=10.1371/journal.ppat.1002940	MRVYAAFVVALVSLLATNSAVLAVTTPTKLAKLTAPEFTDNENRQRRLLRKQEGAELGDEERTSTQNLGNSLMRVFSKEATRKYYLDLFKRADFTANLPKLAKKGGPDRLNDALKKLRKAGISEEKFAELKGAAAKYADDWYRIYGKLDPIRA
Oomycete	cytoplasmic	E0W5Q5_PHYSO	AEK80487, AEK80488	Avh18a1	Phytophthora sojae	Wang, Q., et al. (2011). "Transcriptional Programming and Functional Interactions within the Phytophthora sojae RXLR Effector Repertoire." The Plant Cell 23(6): 2064-2086.	http://www.plantcell.org/content/23/6/2064	MRLTYVLLVAVTTLLVSCDATKPSTEATAVSKRLLRFVEAADEEERRIDFSPEKLRKMLGDETYRLKKFGKWDSDGHTFDGLKHYLLLSDSSMVKLRNMYKAWLEQ
Oomycete	cytoplasmic	E0W4V8_PHYSO	AEI75279, AEK81140	PsAvr3b	Phytophthora sojae	Dong, S., et al. (2011). "Phytophthora sojae Avirulence Effector Avr3b is a Secreted NADH and ADP-ribose Pyrophosphorylase that Modulates Plant Immunity." PLoS Pathog 7(11): e1002353.	http://journals.plos.org/plospathogens/article?id=10.1371/journal.ppat.1002353	MRFLFLLVAVALASAEAAESAAMIHEEAGVSSFNTLTGGNQIQRSLRVYLGANEERGVGGVKLENILTIFVQRAKAKLPQGFTAAALGNWKGFSRRVDTVMEHYPKGLSEKAIKELRTAETKRFTDYAMLGPSDKYNLLRPMQGVDEAMIAPNLVSLTGRKNQVLGDAGGRSVVCNVVMRSEAEGGGILLISSSKLDKQDFILPKGGLEKGEIAYGAAKREVLEEGGVRYRSDIFIFYRWSVLTLVMALQVKVKKLKELGVTLVGDKTYESFLMRSKKVYEQWSESRRLRVWVRECQSIEIPGETQLTVRLLFN
Oomycete	cytoplasmic	C0LF23	ACN59479	PsAvr3c	Phytophthora sojae	Dong, S., et al. (2009). "The Phytophthora sojae Avirulence Locus Avr3c Encodes a Multi-Copy RXLR Effector with Sequence Polymorphisms among Pathogen Strains." PLoS ONE 4(5): e5556.	http://journals.plos.org/plosone/article?id=10.1371/journal.pone.0005556	MRVCSVLLVAAAALIATSNAVEPSATSTVEVAEVQARGADKRFLRSLQTEEEQGDSDVNEAEDGSEERGLFAWIKNAVTGDVLLAKANKGDFEMQTKLFKKWIEEKPKVRQNAIAKIMRDGGRKKYDTVLTAWKYHDKRTANGIGIRGATDDVDELLPGTLIYRAAAGNQGAQSALFSMWIGAEKKTLDTARILLSKSELPAKEYKRLNKAWVQYRRKHK
Oomycete	cytoplasmic	A7L812_PHYSO	ABS50087, ADI72734, ADI72735, ADI72736, ADI72737	PsAvr4/6	Phytophthora sojae	Dou, D., et al. (2010). "Different Domains of Phytophthora sojae Effector Avr4/6 Are Recognized by Soybean Resistance Genes Rps4 and Rps6." Molecular Plant-Microbe Interactions 23(4): 425-435.	http://apsjournals.apsnet.org/doi/abs/10.1094/MPMI-23-4-0425	MGLHKGFFVAVALLALLIVAAPADAITDESQPRDATIVDAPLTGRGANARYLRTSTSIIKAPDAQLPSTKAAIASSVTKEEEERKISTGLSKLRQKLSKRFHDIPDWLLQLQAFLSVGLHHLT
